# Supplementary material for: International multicenter validation of AI-driven ultrasound detection of ovarian cancer
Source: Springer Nature journal article supplement (doi:10.1038/s41591-024-03329-4), 2025-01-01
Supplement: MOESM1 [file 41591_2024_3329_MOESM1_ESM.pdf]

# International multicenter validation of AI-driven ultrasound detection of ovarian cancer

---

In the format provided by the authors and unedited

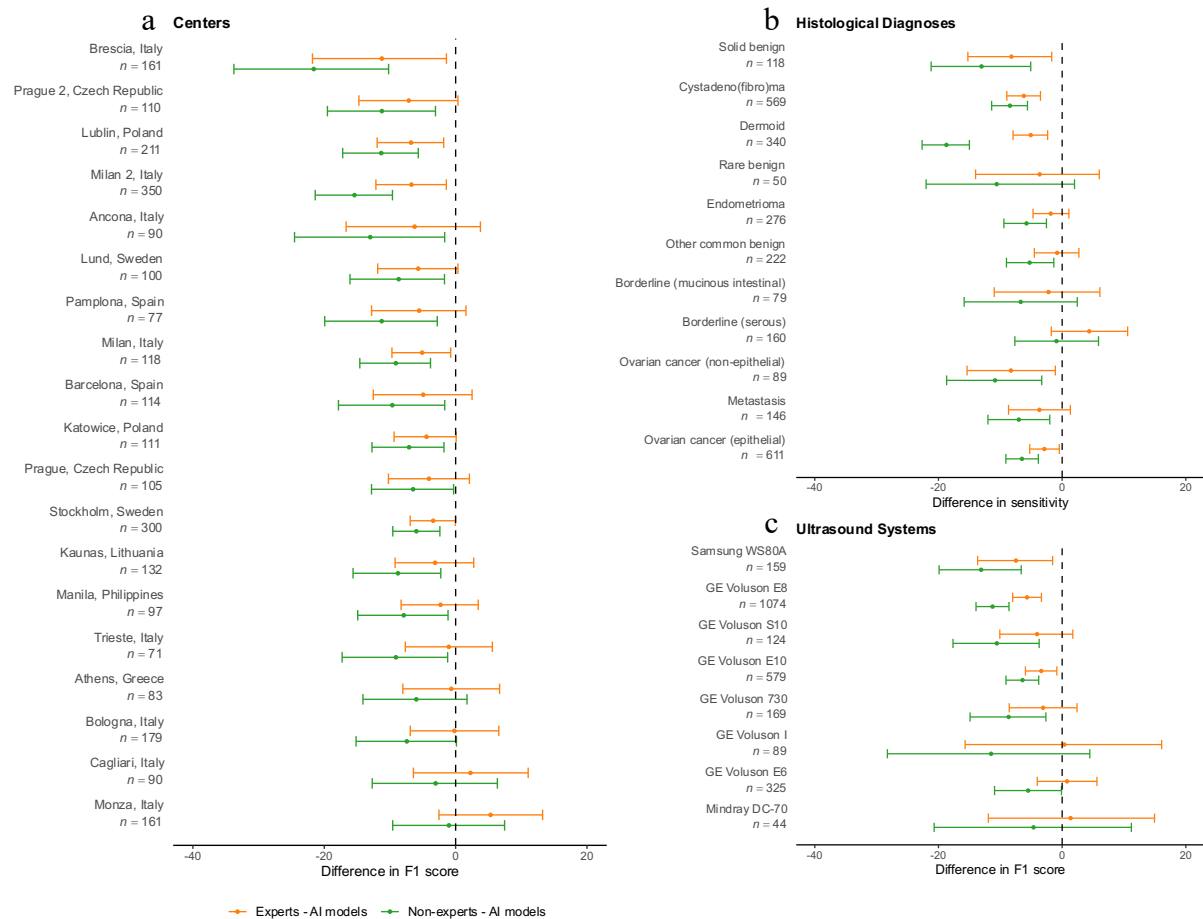

**Supplementary Fig. 1 | Difference in performance between AI models and human examiners on various sub-groups.** Differences in F1 scores between the AI models and the human examiners, by centers (a), ultrasound systems (b) and histological diagnoses (c). Error bars are 95% CIs through bootstrapping.

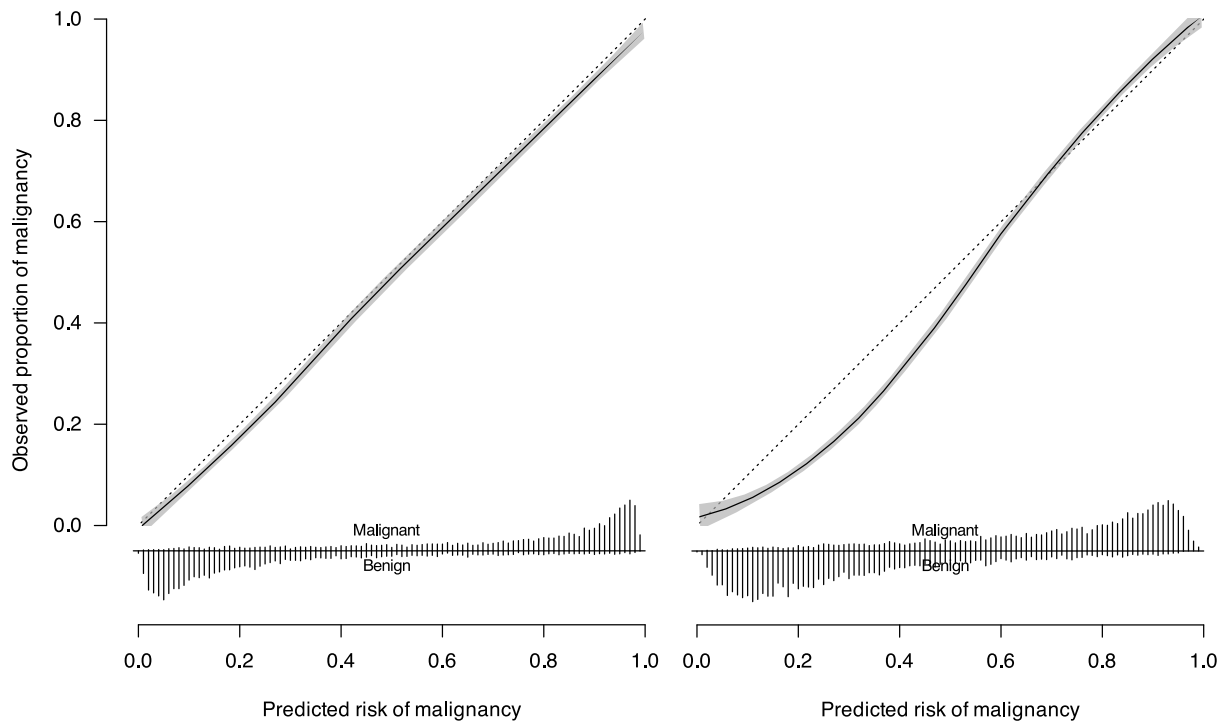

**Supplementary Fig. 2 | Calibration curves of the transformer and CNN models.** Calibration curves of (a) our transformer-based models (DeiT) and (b) convolutional neural network (CNN)-based models (ConvNeXt), respectively. The calibration curves are shown in solid black with 95% confidence bands in gray, depicting the relationship between the predicted risk of malignancy and the actual observed proportion of malignancy. The dotted lines represent the ideal scenario of perfect calibration, where the predicted risks precisely match the observed outcomes. The histograms at the bottom depict the distributions of predicted risks of malignancy, for malignant and benign tumors, above and below the horizontal line, respectively. The calibration curves and confidence bands are based on local regression (loess)<sup>1</sup>, and is based on 12,673 image-level predictions. While not depicted in the figure, a linear logistic calibration curve was also fitted for each of the models, yielding (a) an intercept of -0.19 (95% CI, -0.24–(-)0.14) and a slope of 1.00 (95% CI, 0.96–1.03) for our transformer-based models, and (b) an intercept of -0.24 (95% CI, -0.29–(-)0.20) and a slope of 1.27 (95% CI, 1.23–1.32) for the CNN-based models.

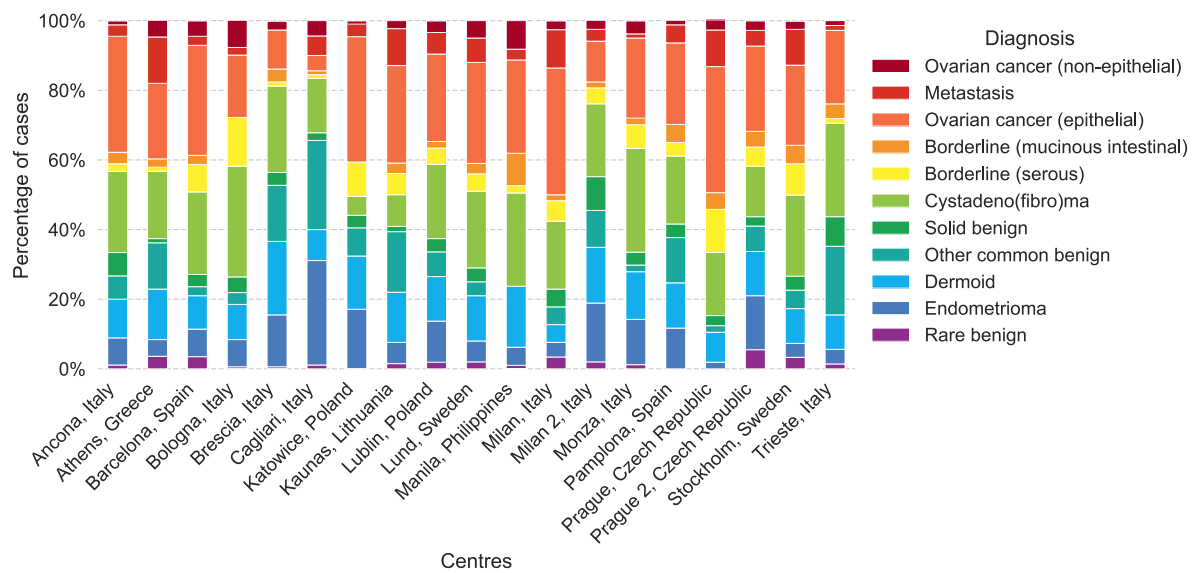

**Supplementary Fig. 3 | Breakdown of histological diagnoses by center**

**Supplementary Table 1 | Hypothesis testing: AI models vs. expert and non-expert examiners**

|                                    | W   | z     | p                       | Location parameter<br>(Hodges-Lehmann estimate) | Effect size<br>(Rank-biserial correlation) |
|------------------------------------|-----|-------|-------------------------|-------------------------------------------------|--------------------------------------------|
| AI models vs. expert examiners     | 561 | 5.012 | $2.328 \times 10^{-10}$ | 3.984                                           | 1.000                                      |
| AI models vs. non-expert examiners | 561 | 5.012 | $2.328 \times 10^{-10}$ | 8.979                                           | 1.000                                      |

Results of two-sided non-parametric Wilcoxon signed-rank tests comparing the diagnostic performance of the AI models with that of expert and non-expert examiners.

**Supplementary Table 2 | Performance of examiners and AI models on matching case sets**

| Examiner      | Cases | F1 score |           | Sensitivity |           | Specificity |           | Accuracy |           | Kappa    |           | MCC      |           |
|---------------|-------|----------|-----------|-------------|-----------|-------------|-----------|----------|-----------|----------|-----------|----------|-----------|
|               |       | Examiner | AI models | Examiner    | AI models | Examiner    | AI models | Examiner | AI models | Examiner | AI models | Examiner | AI models |
| Expert 1      | 932   | 85.04%   | 85.16%    | 83.65%      | 84.47%    | 91.50%      | 90.97%    | 88.41%   | 88.41%    | 0.756    | 0.757     | 0.756    | 0.757     |
| Expert 2      | 676   | 84.37%   | 85.30%    | 81.75%      | 85.77%    | 91.79%      | 89.55%    | 87.72%   | 88.02%    | 0.743    | 0.752     | 0.744    | 0.752     |
| Expert 3      | 2,499 | 82.26%   | 83.67%    | 86.16%      | 85.21%    | 82.96%      | 86.50%    | 84.31%   | 85.95%    | 0.683    | 0.714     | 0.685    | 0.714     |
| Expert 4      | 971   | 82.24%   | 83.27%    | 90.72%      | 85.31%    | 80.10%      | 86.96%    | 84.35%   | 86.30%    | 0.685    | 0.717     | 0.694    | 0.717     |
| Expert 5      | 615   | 82.20%   | 84.05%    | 88.19%      | 85.04%    | 81.44%      | 87.81%    | 84.23%   | 86.67%    | 0.682    | 0.726     | 0.687    | 0.726     |
| Expert 6      | 689   | 81.84%   | 86.42%    | 77.54%      | 88.77%    | 92.01%      | 88.86%    | 86.21%   | 88.82%    | 0.708    | 0.769     | 0.711    | 0.770     |
| Expert 7      | 765   | 81.14%   | 84.75%    | 76.42%      | 86.27%    | 90.70%      | 86.51%    | 84.44%   | 86.41%    | 0.680    | 0.725     | 0.684    | 0.725     |
| Expert 8      | 611   | 81.02%   | 86.27%    | 74.80%      | 87.80%    | 93.00%      | 88.80%    | 85.43%   | 88.38%    | 0.693    | 0.762     | 0.700    | 0.762     |
| Expert 9      | 793   | 81.00%   | 86.06%    | 80.75%      | 87.27%    | 87.26%      | 89.38%    | 84.62%   | 88.52%    | 0.681    | 0.763     | 0.681    | 0.763     |
| Expert 10     | 679   | 80.80%   | 84.43%    | 84.67%      | 86.21%    | 84.45%      | 88.76%    | 84.54%   | 87.78%    | 0.680    | 0.744     | 0.681    | 0.744     |
| Expert 11     | 696   | 80.80%   | 82.48%    | 80.07%      | 84.42%    | 88.10%      | 86.67%    | 84.91%   | 85.78%    | 0.685    | 0.705     | 0.684    | 0.706     |
| Expert 12     | 606   | 80.70%   | 83.46%    | 79.01%      | 82.82%    | 87.21%      | 88.08%    | 83.66%   | 85.81%    | 0.666    | 0.710     | 0.666    | 0.710     |
| Expert 13     | 606   | 80.63%   | 84.73%    | 78.63%      | 84.73%    | 87.50%      | 88.37%    | 83.66%   | 86.80%    | 0.665    | 0.731     | 0.666    | 0.731     |
| Expert 14     | 598   | 80.54%   | 82.54%    | 84.15%      | 84.55%    | 82.67%      | 85.80%    | 83.28%   | 85.28%    | 0.659    | 0.698     | 0.661    | 0.699     |
| Expert 15     | 693   | 80.45%   | 83.79%    | 85.27%      | 83.22%    | 80.55%      | 88.78%    | 82.54%   | 86.44%    | 0.648    | 0.721     | 0.651    | 0.721     |
| Expert 16     | 870   | 80.43%   | 83.12%    | 84.27%      | 83.71%    | 82.49%      | 87.74%    | 83.22%   | 86.09%    | 0.658    | 0.713     | 0.660    | 0.713     |
| Expert 17     | 1,313 | 80.10%   | 82.34%    | 87.93%      | 83.52%    | 79.14%      | 87.23%    | 82.64%   | 85.76%    | 0.649    | 0.704     | 0.657    | 0.704     |
| Expert 18     | 644   | 80.07%   | 84.62%    | 88.76%      | 86.52%    | 76.66%      | 87.27%    | 81.68%   | 86.96%    | 0.634    | 0.733     | 0.645    | 0.734     |
| Expert 19     | 738   | 79.87%   | 83.73%    | 83.33%      | 85.76%    | 83.78%      | 87.78%    | 83.60%   | 86.99%    | 0.661    | 0.729     | 0.662    | 0.730     |
| Expert 20     | 1,428 | 79.65%   | 84.08%    | 88.02%      | 85.24%    | 77.70%      | 88.15%    | 81.86%   | 88.97%    | 0.636    | 0.731     | 0.645    | 0.731     |
| Non-expert 1  | 572   | 79.57%   | 85.78%    | 87.38%      | 88.79%    | 80.73%      | 89.11%    | 83.22%   | 88.99%    | 0.655    | 0.768     | 0.663    | 0.769     |
| Non-expert 2  | 2,555 | 79.51%   | 83.19%    | 83.94%      | 84.83%    | 82.08%      | 87.40%    | 82.82%   | 86.38%    | 0.648    | 0.718     | 0.651    | 0.718     |
| Non-expert 3  | 736   | 79.45%   | 82.99%    | 78.23%      | 82.99%    | 87.56%      | 88.69%    | 83.83%   | 86.41%    | 0.661    | 0.717     | 0.662    | 0.717     |
| Expert 21     | 690   | 79.35%   | 82.57%    | 83.59%      | 85.88%    | 83.41%      | 86.45%    | 83.48%   | 86.23%    | 0.656    | 0.712     | 0.659    | 0.714     |
| Expert 22     | 1,120 | 79.33%   | 84.42%    | 79.92%      | 84.78%    | 84.23%      | 88.25%    | 82.41%   | 86.79%    | 0.640    | 0.730     | 0.640    | 0.730     |
| Expert 23     | 722   | 79.08%   | 82.37%    | 92.11%      | 84.59%    | 74.27%      | 86.91%    | 81.16%   | 86.01%    | 0.626    | 0.708     | 0.647    | 0.709     |
| Expert 24     | 628   | 78.28%   | 82.47%    | 86.36%      | 85.54%    | 78.50%      | 86.27%    | 81.53%   | 85.99%    | 0.625    | 0.708     | 0.633    | 0.710     |
| Expert 25     | 585   | 78.10%   | 85.29%    | 92.13%      | 86.89%    | 63.21%      | 85.85%    | 76.41%   | 86.32%    | 0.538    | 0.725     | 0.568    | 0.726     |
| Non-expert 4  | 628   | 77.95%   | 85.18%    | 80.08%      | 88.67%    | 82.53%      | 86.56%    | 81.53%   | 87.42%    | 0.621    | 0.743     | 0.621    | 0.745     |
| Expert 26     | 913   | 77.70%   | 85.06%    | 74.81%      | 86.38%    | 86.83%      | 87.60%    | 81.71%   | 87.08%    | 0.622    | 0.737     | 0.624    | 0.737     |
| Non-expert 5  | 564   | 77.54%   | 81.93%    | 79.22%      | 80.00%    | 79.29%      | 87.38%    | 79.26%   | 84.04%    | 0.583    | 0.677     | 0.583    | 0.677     |
| Expert 27     | 619   | 77.41%   | 79.58%    | 77.73%      | 79.41%    | 85.56%      | 87.40%    | 82.55%   | 84.33%    | 0.632    | 0.669     | 0.632    | 0.669     |
| Non-expert 6  | 610   | 77.38%   | 82.62%    | 82.63%      | 85.59%    | 80.48%      | 86.36%    | 81.31%   | 86.07%    | 0.616    | 0.710     | 0.619    | 0.711     |
| Expert 28     | 865   | 76.92%   | 83.17%    | 85.29%      | 86.47%    | 76.38%      | 86.10%    | 79.88%   | 86.24%    | 0.594    | 0.716     | 0.603    | 0.717     |
| Non-expert 7  | 644   | 76.82%   | 84.39%    | 83.15%      | 85.02%    | 76.39%      | 88.33%    | 79.19%   | 86.96%    | 0.581    | 0.732     | 0.587    | 0.732     |
| Non-expert 8  | 603   | 76.39%   | 83.27%    | 79.28%      | 85.26%    | 79.83%      | 86.08%    | 79.60%   | 85.74%    | 0.585    | 0.709     | 0.586    | 0.709     |
| Non-expert 9  | 622   | 76.25%   | 82.00%    | 72.08%      | 83.40%    | 87.39%      | 85.15%    | 80.87%   | 84.41%    | 0.603    | 0.683     | 0.606    | 0.683     |
| Expert 29     | 723   | 76.19%   | 82.67%    | 81.08%      | 83.78%    | 77.99%      | 86.89%    | 79.25%   | 85.62%    | 0.579    | 0.704     | 0.583    | 0.704     |
| Expert 30     | 597   | 76.05%   | 81.67%    | 89.27%      | 84.12%    | 70.88%      | 85.99%    | 78.06%   | 85.26%    | 0.566    | 0.694     | 0.588    | 0.694     |
| Non-expert 10 | 586   | 75.78%   | 82.23%    | 83.98%      | 83.12%    | 75.49%      | 87.61%    | 78.84%   | 85.84%    | 0.573    | 0.705     | 0.582    | 0.705     |
| Non-expert 11 | 594   | 75.74%   | 84.03%    | 70.17%      | 84.03%    | 89.89%      | 89.33%    | 81.99%   | 87.21%    | 0.616    | 0.734     | 0.621    | 0.734     |
| Non-expert 12 | 606   | 75.70%   | 83.04%    | 81.27%      | 84.86%    | 76.34%      | 86.20%    | 78.38%   | 85.64%    | 0.564    | 0.706     | 0.568    | 0.707     |
| Non-expert 13 | 703   | 75.45%   | 82.54%    | 89.77%      | 83.50%    | 63.50%      | 85.75%    | 74.82%   | 84.78%    | 0.509    | 0.691     | 0.537    | 0.691     |
| Non-expert 14 | 580   | 75.25%   | 85.12%    | 78.24%      | 86.19%    | 79.18%      | 85.56%    | 78.79%   | 87.59%    | 0.568    | 0.745     | 0.569    | 0.745     |
| Non-expert 15 | 1,149 | 75.13%   | 83.30%    | 78.08%      | 85.91%    | 81.05%      | 87.04%    | 79.90%   | 86.60%    | 0.583    | 0.721     | 0.584    | 0.722     |
| Non-expert 16 | 655   | 74.96%   | 83.68%    | 84.23%      | 86.38%    | 69.95%      | 85.11%    | 76.03%   | 85.65%    | 0.525    | 0.709     | 0.537    | 0.710     |
| Non-expert 17 | 622   | 74.78%   | 85.50%    | 95.45%      | 87.12%    | 55.87%      | 87.71%    | 72.67%   | 87.46%    | 0.479    | 0.745     | 0.535    | 0.745     |
| Expert 31     | 892   | 74.52%   | 82.67%    | 71.88%      | 86.08%    | 86.30%      | 85.56%    | 80.61%   | 85.76%    | 0.589    | 0.706     | 0.590    | 0.708     |
| Expert 32     | 886   | 74.43%   | 82.27%    | 64.79%      | 83.66%    | 93.79%      | 86.82%    | 82.17%   | 85.55%    | 0.612    | 0.701     | 0.628    | 0.701     |
| Non-expert 18 | 649   | 74.25%   | 80.89%    | 87.08%      | 83.75%    | 72.13%      | 86.31%    | 77.66%   | 85.36%    | 0.553    | 0.691     | 0.572    | 0.692     |
| Non-expert 19 | 770   | 74.19%   | 81.93%    | 83.76%      | 83.76%    | 71.05%      | 85.75%    | 76.23%   | 84.94%    | 0.527    | 0.690     | 0.539    | 0.691     |
| Non-expert 20 | 583   | 74.04%   | 84.73%    | 92.86%      | 87.39%    | 60.00%      | 86.96%    | 73.41%   | 87.14%    | 0.490    | 0.736     | 0.534    | 0.737     |
| Non-expert 21 | 574   | 73.98%   | 82.15%    | 78.45%      | 82.33%    | 77.19%      | 87.72%    | 77.70%   | 85.54%    | 0.546    | 0.700     | 0.549    | 0.700     |
| Expert 33     | 682   | 73.29%   | 84.08%    | 79.51%      | 85.87%    | 73.43%      | 86.97%    | 75.95%   | 86.51%    | 0.517    | 0.724     | 0.522    | 0.724     |
| Non-expert 22 | 598   | 73.16%   | 86.58%    | 75.09%      | 86.42%    | 75.98%      | 89.49%    | 75.59%   | 88.13%    | 0.508    | 0.759     | 0.509    | 0.759     |
| Non-expert 23 | 673   | 73.08%   | 83.42%    | 71.43%      | 83.28%    | 82.12%      | 87.82%    | 77.56%   | 85.88%    | 0.539    | 0.711     | 0.539    | 0.711     |
| Non-expert 24 | 694   | 72.73%   | 82.17%    | 89.36%      | 83.33%    | 61.41%      | 86.65%    | 72.77%   | 85.30%    | 0.474    | 0.697     | 0.507    | 0.697     |
| Non-expert 25 | 628   | 72.42%   | 84.40%    | 87.35%      | 86.12%    | 65.54%      | 88.51%    | 74.04%   | 87.58%    | 0.492    | 0.741     | 0.519    | 0.741     |
| Non-expert 26 | 607   | 71.91%   | 82.22%    | 75.89%      | 84.98%    | 74.86%      | 84.46%    | 75.29%   | 84.68%    | 0.500    | 0.688     | 0.502    | 0.689     |
| Non-expert 27 | 609   | 71.86%   | 82.47%    | 70.64%      | 85.11%    | 83.69%      | 86.63%    | 78.65%   | 86.04%    | 0.547    | 0.709     | 0.547    | 0.710     |
| Non-expert 28 | 612   | 70.18%   | 82.44%    | 66.28%      | 82.76%    | 83.19%      | 86.61%    | 75.98%   | 84.97%    | 0.502    | 0.693     | 0.504    | 0.693     |
| Non-expert 29 | 583   | 69.55%   | 80.93%    | 85.78%      | 84.89%    | 61.73%      | 84.36%    | 71.01%   | 84.56%    | 0.437    | 0.680     | 0.467    | 0.682     |
| Non-expert 30 | 568   | 67.96%   | 84.68%    | 69.30%      | 87.28%    | 76.76%      | 87.35%    | 73.77%   | 87.32%    | 0.458    | 0.739     | 0.458    | 0.740     |
| Non-expert 31 | 579   | 67.82%   | 84.43%    | 56.61%      | 85.12%    | 92.58%      | 88.13%    | 77.55%   | 86.87%    | 0.516    | 0.731     | 0.541    | 0.731     |
| Non-expert 32 | 1,501 | 63.52%   | 84.43%    | 51.97%      | 85.20%    | 92.05%      | 88.69%    | 75.82%   | 87.28%    | 0.467    | 0.737     | 0.494    | 0.737     |
| Non-expert 33 | 578   | 60.30%   | 83.29%    | 56.60%      | 83.49%    | 81.97%      | 90.16%    | 72.66%   | 87.72%    | 0.396    | 0.736     | 0.398    | 0.736     |

Kappa = Cohen's kappa coefficient. MCC = Matthew's correlation coefficient.

Supplementary Table 3 | Performance of AI models and human examiners by center

| Centre                   | Cases                              |             | F1 score                | Sensitivity              | Specificity              | Accuracy                | Kappa                  | MCC                    | AUC                    | Brier score            |
|--------------------------|------------------------------------|-------------|-------------------------|--------------------------|--------------------------|-------------------------|------------------------|------------------------|------------------------|------------------------|
| Ancona, Italy            | 90<br>(51 benign, 39 malignant)    | AI models   | 80.00%<br>(68.35–89.16) | 71.79%<br>(56.76–85.37)  | 94.12%<br>(86.79–100.00) | 84.44%<br>(76.67–91.11) | 0.675<br>(0.509–0.817) | 0.687<br>(0.530–0.824) | 0.945<br>(0.891–0.986) | 0.105<br>(0.075–0.139) |
|                          |                                    | Experts     | 73.53%<br>(60.60–84.51) | 64.10%<br>(50.00–80.00)  | 92.16%<br>(82.76–98.08)  | 90.00%<br>(71.11–87.78) | 0.580<br>(0.398–0.743) | 0.597<br>(0.418–0.752) |                        |                        |
|                          |                                    | Non-experts | 66.67%<br>(52.94–78.57) | 61.54%<br>(44.68–75.68)  | 84.31%<br>(74.51–94.12)  | 74.44%<br>(64.44–83.33) | 0.465<br>(0.270–0.640) | 0.475<br>(0.279–0.649) |                        |                        |
|                          | 83<br>(47 benign, 36 malignant)    | AI models   | 86.49%<br>(76.92–93.98) | 88.89%<br>(77.50–97.44)  | 87.23%<br>(76.92–95.83)  | 87.95%<br>(80.72–93.98) | 0.756<br>(0.604–0.880) | 0.757<br>(0.608–0.885) | 0.931<br>(0.862–0.981) | 0.098<br>(0.064–0.138) |
|                          |                                    | Experts     | 86.11%<br>(76.06–93.75) | 83.33%<br>(70.59–94.59)  | 91.49%<br>(82.50–98.04)  | 87.95%<br>(80.72–95.18) | 0.755<br>(0.601–0.880) | 0.755<br>(0.606–0.886) |                        |                        |
|                          |                                    | Non-experts | 81.08%<br>(68.97–89.55) | 80.56%<br>(67.50–93.02)  | 85.11%<br>(73.81–94.00)  | 83.13%<br>(74.70–90.36) | 0.659<br>(0.479–0.807) | 0.660<br>(0.483–0.808) |                        |                        |
| Barcelona, Spain         | 114<br>(58 benign, 56 malignant)   | AI models   | 84.11%<br>(75.79–90.91) | 80.36%<br>(69.81–90.16)  | 89.66%<br>(81.03–96.67)  | 85.09%<br>(78.07–91.23) | 0.701<br>(0.561–0.824) | 0.704<br>(0.567–0.825) | 0.899<br>(0.837–0.951) | 0.128<br>(0.098–0.160) |
|                          |                                    | Experts     | 79.63%<br>(69.90–86.96) | 78.57%<br>(65.45–87.69)  | 82.76%<br>(72.73–92.06)  | 80.70%<br>(72.81–86.84) | 0.613<br>(0.443–0.738) | 0.614<br>(0.448–0.746) |                        |                        |
|                          |                                    | Non-experts | 74.29%<br>(64.65–82.88) | 73.21%<br>(60.71–84.31)  | 77.59%<br>(66.67–88.33)  | 75.44%<br>(67.54–83.33) | 0.508<br>(0.346–0.661) | 0.509<br>(0.349–0.664) |                        |                        |
|                          | 179<br>(104 benign, 75 malignant)  | AI models   | 73.53%<br>(64.57–81.20) | 66.67%<br>(56.06–77.27)  | 89.42%<br>(82.95–95.00)  | 79.89%<br>(73.74–85.47) | 0.576<br>(0.452–0.692) | 0.584<br>(0.461–0.699) | 0.855<br>(0.794–0.909) | 0.151<br>(0.122–0.182) |
|                          |                                    | Experts     | 72.97%<br>(64.79–80.77) | 73.33%<br>(62.86–82.90)  | 81.73%<br>(73.33–88.29)  | 77.65%<br>(71.51–83.80) | 0.538<br>(0.416–0.662) | 0.538<br>(0.417–0.664) |                        |                        |
|                          |                                    | Non-experts | 66.23%<br>(56.72–74.53) | 66.67%<br>(55.55–77.14)  | 75.00%<br>(66.39–83.18)  | 72.07%<br>(64.80–78.21) | 0.426<br>(0.276–0.547) | 0.426<br>(0.276–0.548) |                        |                        |
| Brescia, Italy           | 161<br>(131 benign, 30 malignant)  | AI models   | 77.19%<br>(63.16–88.14) | 73.33%<br>(56.52–88.89)  | 91.93%<br>(92.59–99.22)  | 91.93%<br>(87.58–95.65) | 0.723<br>(0.561–0.854) | 0.725<br>(0.566–0.855) | 0.921<br>(0.853–0.970) | 0.086<br>(0.063–0.112) |
|                          |                                    | Experts     | 64.41%<br>(50.79–78.69) | 63.33%<br>(47.37–81.48)  | 93.13%<br>(87.90–96.95)  | 86.96%<br>(81.99–92.55) | 0.568<br>(0.408–0.737) | 0.570<br>(0.412–0.738) |                        |                        |
|                          |                                    | Non-experts | 55.38%<br>(40.00–69.23) | 60.00%<br>(42.31–78.57)  | 87.02%<br>(80.83–92.31)  | 81.99%<br>(75.78–88.20) | 0.442<br>(0.266–0.610) | 0.444<br>(0.268–0.616) |                        |                        |
|                          | 90<br>(75 benign, 15 malignant)    | AI models   | 75.00%<br>(54.55–90.00) | 80.00%<br>(57.14–100.00) | 93.33%<br>(87.18–98.63)  | 91.11%<br>(84.44–96.67) | 0.686<br>(0.468–0.877) | 0.698<br>(0.472–0.879) | .922<br>(0.767–0.997)  | 0.074<br>(0.050–0.104) |
|                          |                                    | Experts     | 75.86%<br>(55.56–90.00) | 80.00%<br>(60.00–100.00) | 92.00%<br>(86.25–97.47)  | 91.11%<br>(84.44–96.67) | 0.711<br>(0.475–0.877) | 0.713<br>(0.492–0.877) |                        |                        |
|                          |                                    | Non-experts | 62.50%<br>(41.38–80.00) | 73.33%<br>(50.00–94.12)  | 88.00%<br>(80.26–94.67)  | 85.56%<br>(77.78–92.22) | 0.541<br>(0.308–0.752) | 0.546<br>(0.322–0.758) |                        |                        |
| Katowice, Poland         | 111<br>(55 benign, 56 malignant)   | AI models   | 95.58%<br>(91.09–99.08) | 96.43%<br>(90.74–100.00) | 94.55%<br>(87.72–100.00) | 95.50%<br>(90.99–99.10) | 0.910<br>(0.820–0.982) | 0.910<br>(0.822–0.982) | 0.977<br>(0.947–0.997) | 0.067<br>(0.047–0.091) |
|                          |                                    | Experts     | 91.07%<br>(84.96–96.00) | 91.07%<br>(82.35–97.96)  | 92.73%<br>(83.64–98.21)  | 90.99%<br>(85.59–96.40) | 0.820<br>(0.710–0.925) | 0.820<br>(0.711–0.925) |                        |                        |
|                          |                                    | Non-experts | 89.09%<br>(81.63–94.21) | 89.29%<br>(79.99–96.36)  | 89.09%<br>(78.95–96.08)  | 89.19%<br>(81.98–93.69) | 0.784<br>(0.639–0.874) | 0.784<br>(0.640–0.875) |                        |                        |
|                          | 132<br>(66 benign, 66 malignant)   | AI models   | 86.61%<br>(79.66–92.31) | 83.33%<br>(73.85–91.89)  | 90.91%<br>(83.33–97.06)  | 87.12%<br>(81.06–92.42) | 0.742<br>(0.621–0.848) | 0.745<br>(0.624–0.849) | 0.952<br>(0.915–0.981) | 0.098<br>(0.075–0.124) |
|                          |                                    | Experts     | 83.33%<br>(75.97–89.92) | 81.82%<br>(72.88–91.53)  | 84.85%<br>(75.38–92.75)  | 83.33%<br>(77.27–90.15) | 0.667<br>(0.543–0.797) | 0.668<br>(0.543–0.798) |                        |                        |
|                          |                                    | Non-experts | 78.12%<br>(69.35–84.89) | 78.79%<br>(68.63–88.24)  | 77.27%<br>(65.57–86.11)  | 78.03%<br>(70.45–84.09) | 0.561<br>(0.405–0.682) | 0.561<br>(0.406–0.685) |                        |                        |
| Lublin, Poland           | 211<br>(124 benign, 87 malignant)  | AI models   | 80.87%<br>(74.12–86.86) | 85.06%<br>(77.01–92.22)  | 82.26%<br>(75.57–88.79)  | 83.41%<br>(78.20–88.63) | 0.663<br>(0.558–0.762) | 0.665<br>(0.562–0.765) | 0.897<br>(0.852–0.937) | 0.130<br>(0.103–0.158) |
|                          |                                    | Experts     | 73.80%<br>(66.67–80.85) | 79.31%<br>(70.59–87.78)  | 79.19%<br>(67.46–82.71)  | 76.53%<br>(71.09–82.46) | 0.534<br>(0.420–0.649) | 0.538<br>(0.427–0.652) |                        |                        |
|                          |                                    | Non-experts | 69.84%<br>(61.80–76.70) | 75.86%<br>(66.67–85.06)  | 70.16%<br>(62.07–78.05)  | 72.51%<br>(66.35–78.67) | 0.452<br>(0.329–0.566) | 0.460<br>(0.335–0.573) |                        |                        |
|                          | 100<br>(51 benign, 49 malignant)   | AI models   | 85.15%<br>(76.92–91.84) | 87.76%<br>(78.00–96.00)  | 82.35%<br>(70.83–92.00)  | 85.00%<br>(78.00–92.00) | 0.702<br>(0.552–0.835) | 0.702<br>(0.556–0.835) | 0.895<br>(0.827–0.951) | 0.136<br>(0.106–0.169) |
|                          |                                    | Experts     | 79.61%<br>(70.10–87.27) | 83.67%<br>(73.47–93.88)  | 72.55%<br>(60.38–84.62)  | 79.00%<br>(70.00–86.00) | 0.581<br>(0.408–0.721) | 0.587<br>(0.417–0.731) |                        |                        |
|                          |                                    | Non-experts | 75.73%<br>(66.67–84.91) | 79.59%<br>(69.39–91.30)  | 70.59%<br>(57.41–82.76)  | 75.00%<br>(67.00–84.00) | 0.501<br>(0.340–0.678) | 0.503<br>(0.343–0.680) |                        |                        |
| Manila, Philippines      | 97<br>(49 benign, 48 malignant)    | AI models   | 83.81%<br>(75.51–90.91) | 91.67%<br>(82.98–98.08)  | 73.47%<br>(60.87–85.71)  | 82.47%<br>(75.26–89.69) | 0.650<br>(0.497–0.794) | 0.662<br>(0.514–0.800) | 0.944<br>(0.896–0.980) | 0.110<br>(0.078–0.145) |
|                          |                                    | Experts     | 81.63%<br>(72.50–89.11) | 83.33%<br>(72.55–93.48)  | 79.59%<br>(66.67–89.80)  | 81.44%<br>(73.20–88.66) | 0.630<br>(0.464–0.773) | 0.630<br>(0.465–0.774) |                        |                        |
|                          |                                    | Non-experts | 77.42%<br>(65.78–84.68) | 79.17%<br>(65.38–86.68)  | 75.51%<br>(61.11–85.71)  | 77.32%<br>(67.01–83.51) | 0.547<br>(0.340–0.672) | 0.548<br>(0.342–0.680) |                        |                        |
|                          | 118<br>(50 benign, 68 malignant)   | AI models   | 89.66%<br>(84.00–94.34) | 95.59%<br>(90.14–100.00) | 87.00%<br>(83.64–87.27)  | 87.29%<br>(81.36–93.22) | 0.733<br>(0.599–0.851) | 0.743<br>(0.619–0.855) | 0.935<br>(0.883–0.976) | 0.101<br>(0.074–0.131) |
|                          |                                    | Experts     | 84.77%<br>(77.86–90.32) | 91.18%<br>(83.58–97.10)  | 66.00%<br>(53.85–80.00)  | 81.36%<br>(73.73–87.29) | 0.601<br>(0.446–0.737) | 0.616<br>(0.459–0.745) |                        |                        |
|                          |                                    | Non-experts | 80.56%<br>(72.87–87.01) | 85.29%<br>(76.56–93.42)  | 64.00%<br>(50.00–77.08)  | 76.27%<br>(68.64–83.90) | 0.504<br>(0.339–0.656) | 0.509<br>(0.347–0.662) |                        |                        |
| Milan 2, Italy           | 350<br>(266 benign, 84 malignant)  | AI models   | 78.31%<br>(71.51–84.42) | 88.10%<br>(80.68–94.57)  | 88.35%<br>(84.29–92.11)  | 88.29%<br>(84.86–91.43) | 0.704<br>(0.618–0.785) | 0.712<br>(0.629–0.790) | 0.944<br>(0.919–0.966) | 0.098<br>(0.081–0.116) |
|                          |                                    | Experts     | 71.20%<br>(64.00–78.39) | 80.95%<br>(71.25–88.46)  | 86.09%<br>(81.89–90.16)  | 84.57%<br>(80.86–88.29) | 0.606<br>(0.518–0.702) | 0.615<br>(0.526–0.708) |                        |                        |
|                          |                                    | Non-experts | 62.69%<br>(54.78–70.29) | 75.00%<br>(64.63–83.56)  | 80.45%<br>(75.48–84.94)  | 78.86%<br>(74.57–83.14) | 0.482<br>(0.386–0.583) | 0.495<br>(0.397–0.593) |                        |                        |
|                          | 161<br>(102 benign, 59 malignant)  | AI models   | 78.50%<br>(68.89–86.49) | 71.19%<br>(59.26–82.76)  | 94.12%<br>(89.11–98.10)  | 85.71%<br>(80.12–90.68) | 0.680<br>(0.550–0.795) | 0.688<br>(0.563–0.801) | 0.960<br>(0.931–0.983) | 0.095<br>(0.075–0.118) |
|                          |                                    | Experts     | 83.48%<br>(75.81–90.23) | 83.05%<br>(73.53–92.31)  | 91.18%<br>(84.76–96.08)  | 88.20%<br>(82.61–92.55) | 0.741<br>(0.629–0.844) | 0.743<br>(0.629–0.845) |                        |                        |
|                          |                                    | Non-experts | 77.59%<br>(68.04–85.11) | 76.27%<br>(65.52–87.10)  | 87.25%<br>(80.65–93.48)  | 83.85%<br>(77.64–88.82) | 0.650<br>(0.513–0.761) | 0.652<br>(0.515–0.762) |                        |                        |
| Pamplona, Spain          | 77<br>(47 benign, 30 malignant)    | AI models   | 89.66%<br>(80.00–96.77) | 86.67%<br>(73.33–96.97)  | 95.74%<br>(89.19–100.00) | 92.21%<br>(85.71–97.40) | 0.834<br>(0.695–0.946) | 0.835<br>(0.699–0.947) | 0.962<br>(0.910–0.996) | 0.072<br>(0.043–0.106) |
|                          |                                    | Experts     | 82.76%<br>(69.38–91.80) | 76.67%<br>(61.54–91.67)  | 83.62%<br>(84.44–100.00) | 87.01%<br>(79.22–93.51) | 0.724<br>(0.541–0.866) | 0.725<br>(0.548–0.869) |                        |                        |
|                          |                                    | Non-experts | 75.47%<br>(61.54–86.96) | 70.00%<br>(54.29–87.10)  | 89.36%<br>(79.55–97.62)  | 81.82%<br>(74.03–90.91) | 0.618<br>(0.423–0.787) | 0.620<br>(0.430–0.791) |                        |                        |
|                          | 105<br>(35 benign, 70 malignant)   | AI models   | 88.24%<br>(81.97–93.43) | 85.71%<br>(76.92–93.42)  | 84.76%<br>(69.23–94.29)  | 86.69%<br>(77.14–91.43) | 0.667<br>(0.511–0.806) | 0.669<br>(0.517–0.809) | 0.946<br>(0.898–0.982) | 0.103<br>(0.079–0.131) |
|                          |                                    | Experts     | 84.56%<br>(77.27–90.12) | 88.57%<br>(79.69–95.08)  | 57.14%<br>(41.67–75.00)  | 78.10%<br>(69.52–85.71) | 0.481<br>(0.288–0.658) | 0.487<br>(0.296–0.664) |                        |                        |
|                          |                                    | Non-experts | 82.12%<br>(74.29–88.05) | 87.14%<br>(77.94–94.29)  | 51.43%<br>(33.33–66.67)  | 74.29%<br>(65.71–82.86) | 0.391<br>(0.190–0.566) | 0.396<br>(0.195–0.577) |                        |                        |
| Prague 2, Czech Republic | 110<br>(64 benign, 46 malignant)   | AI models   | 82.11%<br>(72.92–89.80) | 84.78%<br>(73.33–94.74)  | 84.38%<br>(75.00–92.65)  | 84.55%<br>(77.27–90.91) | 0.685<br>(0.542–0.816) | 0.686<br>(0.545–0.818) | 0.921<br>(0.864–0.967) | 0.118<br>(0.090–0.150) |
|                          |                                    | Experts     | 75.00%<br>(64.44–84.21) | 76.26%<br>(66.00–90.00)  | 78.12%<br>(67.19–87.69)  | 78.19%<br>(70.00–85.45) | 0.557<br>(0.397–0.709) | 0.559<br>(0.400–0.713) |                        |                        |
|                          |                                    | Non-experts | 71.29%<br>(59.70–80.67) | 76.09%<br>(63.04–88.10)  | 71.88%<br>(60.87–82.81)  | 73.64%<br>(65.45–81.82) | 0.473<br>(0.307–0.636) | 0.479<br>(0.311–0.638) |                        |                        |
|                          | 300<br>(150 benign, 150 malignant) | AI models   | 84.83%<br>(80.40–88.77) | 91.33%<br>(86.52–95.54)  | 76.00%<br>(68.87–82.67)  | 83.67%<br>(79.33–87.67) | 0.673<br>(0.587–0.753) | 0.681<br>(0.597–0.759) | 0.921<br>(0.889–0.948) | 0.121<br>(0.102–0.142) |
|                          |                                    | Experts     | 81.66%<br>(76.57–85.80) | 89.33%<br>(84.21–94.16)  | 69.33%<br>(62.18–76.81)  | 79.67%<br>(75.00–84.00) | 0.593<br>(0.499–0.679) | 0.608<br>(0.513–0.689) |                        |                        |
|                          |                                    | Non-experts | 79.04%<br>(73.82–83.47) | 89.33%<br>(83.67–93.71)  | 63.33%<br>(55.40–70.70)  | 76.33%<br>(71.33–80.67) | 0.527<br>(0.428–0.612) | 0.545<br>(0.448–0.627) |                        |                        |
| Trieste, Italy           | 71<br>(50 benign, 21 malignant)    | AI models   | 79.17%<br>(64.28–90.48) | 90.48%<br>(76.00–100.00) | 84.00%<br>(72.92–93.75)  | 85.92%<br>(77.46–92.96) | 0.688<br>(0.498–0.852) | 0.700<br>(0.519–0.857) | 0.950<br>(0.895–0.989) | 0.099<br>(0.066–0.137) |
|                          |                                    | Experts     | 73.91%<br>(57.89–86.96) | 85.71%<br>(69.22–100.00) | 82.00%<br>(70.00–91.67)  | 83.10%<br>(73.24–91.55) | 0.616<br>(0.412–0.795) | 0.621<br>(0.433–0.804) |                        |                        |
|                          |                                    | Non-experts | 64.00%<br>(46.15–77.42) | 80.95%<br>(60.00–95.00)  | 70.00%<br>(58.00–83.02)  | 73.24%<br>(63.38–83.10) | 0.433<br>(0.226–0.639) | 0.466<br>(0.247–0.656) |                        |                        |

Data in parentheses are 95% CIs through bootstrapping. Kappa = Cohen's kappa coefficient. MCC = Matthew's correlation coefficient.

**Supplementary Table 4 | Performance of AI models and human examiners by ultrasound system**

| Ultrasound System | Cases                                   |             | F1 score                | Sensitivity              | Specificity               | Accuracy                | Kappa                  | MCC                    | AUC                    | Brier score            |
|-------------------|-----------------------------------------|-------------|-------------------------|--------------------------|---------------------------|-------------------------|------------------------|------------------------|------------------------|------------------------|
| GE Voluson E6     | 325<br>(200 benign,<br>125 malignant)   | AI models   | 79.15%<br>(73.15–84.43) | 74.40%<br>(66.42–81.91)  | 91.50%<br>(87.44–95.15)   | 84.92%<br>(80.92–88.62) | 0.674<br>(0.588–0.752) | 0.678<br>(0.593–0.756) | 0.911<br>(0.875–0.943) | 0.114<br>(0.096–0.134) |
|                   |                                         | Experts     | 80.00%<br>(74.29–85.14) | 79.20%<br>(72.00–86.32)  | 88.00%<br>(83.41–92.31)   | 84.62%<br>(80.62–88.31) | 0.676<br>(0.590–0.755) | 0.676<br>(0.591–0.755) |                        |                        |
|                   |                                         | Non-experts | 73.75%<br>(66.95–79.53) | 73.60%<br>(65.08–80.74)  | 84.00%<br>(78.72–88.78)   | 80.00%<br>(75.38–84.00) | 0.578<br>(0.477–0.662) | 0.579<br>(0.477–0.663) |                        |                        |
| GE Voluson E8     | 1,074<br>(685 benign,<br>389 malignant) | AI models   | 82.81%<br>(79.89–85.43) | 84.83%<br>(81.28–88.29)  | 88.61%<br>(86.21–90.91)   | 87.24%<br>(85.20–89.20) | 0.727<br>(0.684–0.767) | 0.727<br>(0.684–0.768) | 0.925<br>(0.908–0.941) | 0.106<br>(0.096–0.117) |
|                   |                                         | Experts     | 77.09%<br>(73.67–79.95) | 79.69%<br>(75.41–83.38)  | 84.53%<br>(81.92–87.28)   | 82.87%<br>(80.45–84.92) | 0.633<br>(0.583–0.677) | 0.635<br>(0.585–0.678) |                        |                        |
|                   |                                         | Non-experts | 71.20%<br>(67.41–74.51) | 75.32%<br>(70.57–79.34)  | 79.56%<br>(76.49–82.56)   | 77.93%<br>(75.42–80.35) | 0.534<br>(0.480–0.584) | 0.536<br>(0.483–0.586) |                        |                        |
| GE Voluson E10    | 579<br>(287 benign,<br>292 malignant)   | AI models   | 85.57%<br>(82.51–88.40) | 89.38%<br>(85.71–92.86)  | 80.14%<br>(75.34–84.56)   | 84.80%<br>(81.87–87.56) | 0.696<br>(0.636–0.751) | 0.699<br>(0.640–0.754) | 0.926<br>(0.905–0.945) | 0.116<br>(0.103–0.129) |
|                   |                                         | Experts     | 81.59%<br>(77.99–84.56) | 88.01%<br>(84.05–91.55)  | 71.78%<br>(66.10–76.67)   | 79.97%<br>(76.51–82.90) | 0.599<br>(0.529–0.658) | 0.606<br>(0.537–0.664) |                        |                        |
|                   |                                         | Non-experts | 78.07%<br>(74.50–81.54) | 86.30%<br>(82.27–90.12)  | 64.81%<br>(59.18–70.29)   | 75.65%<br>(72.19–79.10) | 0.512<br>(0.443–0.578) | 0.523<br>(0.455–0.590) |                        |                        |
| GE Voluson I      | 89<br>(74 benign,<br>15 malignant)      | AI models   | 75.00%<br>(54.55–89.47) | 80.00%<br>(57.14–100.00) | 93.24%<br>(86.96–98.63)   | 91.01%<br>(84.27–96.63) | 0.695<br>(0.468–0.869) | 0.697<br>(0.482–0.870) | 0.922<br>(0.770–0.997) | 0.074<br>(0.050–0.104) |
|                   |                                         | Experts     | 75.86%<br>(54.55–89.66) | 80.00%<br>(60.00–100.00) | 91.89%<br>(86.08–97.50)   | 91.01%<br>(84.27–96.63) | 0.710<br>(0.468–0.871) | 0.712<br>(0.482–0.875) |                        |                        |
|                   |                                         | Non-experts | 62.50%<br>(42.09–80.00) | 73.33%<br>(50.00–94.44)  | 87.84%<br>(80.28–94.67)   | 85.39%<br>(78.65–92.13) | 0.540<br>(0.313–0.751) | 0.545<br>(0.325–0.758) |                        |                        |
| GE Voluson S10    | 124<br>(72 benign,<br>52 malignant)     | AI models   | 83.48%<br>(75.27–90.27) | 92.31%<br>(84.31–98.28)  | 79.17%<br>(69.23–88.16)   | 84.68%<br>(78.23–91.13) | 0.694<br>(0.563–0.817) | 0.705<br>(0.581–0.821) | 0.954<br>(0.915–0.983) | 0.105<br>(0.078–0.134) |
|                   |                                         | Experts     | 79.28%<br>(70.37–87.18) | 82.69%<br>(72.34–92.45)  | 80.56%<br>(71.83–89.71)   | 81.45%<br>(75.00–88.71) | 0.626<br>(0.494–0.767) | 0.630<br>(0.497–0.769) |                        |                        |
|                   |                                         | Non-experts | 73.87%<br>(62.92–81.55) | 76.92%<br>(65.52–88.46)  | 76.39%<br>(64.79–84.72)   | 77.42%<br>(68.55–83.06) | 0.536<br>(0.359–0.661) | 0.536<br>(0.364–0.666) |                        |                        |
| GE Voluson 730    | 169<br>(89 benign,<br>90 malignant)     | AI models   | 88.31%<br>(82.35–93.33) | 85.00%<br>(76.62–92.41)  | 93.26%<br>(87.63–97.89)   | 89.35%<br>(84.62–94.08) | 0.786<br>(0.687–0.876) | 0.788<br>(0.691–0.877) | 0.956<br>(0.926–0.981) | 0.093<br>(0.073–0.115) |
|                   |                                         | Experts     | 85.71%<br>(78.83–90.70) | 83.75%<br>(75.31–91.67)  | 88.76%<br>(81.25–94.74)   | 86.98%<br>(81.07–91.12) | 0.738<br>(0.611–0.822) | 0.739<br>(0.615–0.823) |                        |                        |
|                   |                                         | Non-experts | 70.00%<br>(72.05–86.02) | 81.25%<br>(71.21–88.64)  | 80.90%<br>(71.76–88.37)   | 80.07%<br>(73.96–86.39) | 0.619<br>(0.480–0.727) | 0.620<br>(0.482–0.727) |                        |                        |
| Mindray DC-70     | 44<br>(17 benign,<br>27 malignant)      | AI models   | 72.73%<br>(55.81–86.21) | 59.26%<br>(40.62–77.78)  | 94.12%<br>(80.00–100.00)  | 72.73%<br>(59.09–86.36) | 0.481<br>(0.255–0.715) | 0.534<br>(0.309–0.728) | 0.919<br>(0.826–0.987) | 0.148<br>(0.094–0.210) |
|                   |                                         | Experts     | 74.42%<br>(57.89–87.27) | 59.26%<br>(41.67–78.57)  | 100.00%<br>(86.67–100.00) | 75.00%<br>(61.36–86.36) | 0.520<br>(0.298–0.732) | 0.571<br>(0.375–0.760) |                        |                        |
|                   |                                         | Non-experts | 69.57%<br>(50.00–82.61) | 55.56%<br>(35.71–73.91)  | 88.24%<br>(73.33–100.00)  | 68.18%<br>(54.55–81.82) | 0.395<br>(0.169–0.642) | 0.442<br>(0.208–0.667) |                        |                        |
| Samsung WS80A     | 159<br>(104 benign,<br>55 malignant)    | AI models   | 86.67%<br>(79.28–92.68) | 94.55%<br>(87.72–100.00) | 87.50%<br>(80.73–93.52)   | 89.94%<br>(84.91–94.34) | 0.787<br>(0.681–0.881) | 0.794<br>(0.694–0.885) | 0.958<br>(0.926–0.983) | 0.089<br>(0.067–0.114) |
|                   |                                         | Experts     | 79.67%<br>(70.67–86.36) | 89.09%<br>(80.33–96.43)  | 81.73%<br>(73.12–88.24)   | 84.28%<br>(77.99–89.31) | 0.671<br>(0.541–0.773) | 0.681<br>(0.556–0.780) |                        |                        |
|                   |                                         | Non-experts | 73.77%<br>(64.29–81.63) | 87.27%<br>(76.92–94.83)  | 74.04%<br>(66.00–82.52)   | 79.25%<br>(71.70–84.91) | 0.568<br>(0.432–0.685) | 0.584<br>(0.454–0.698) |                        |                        |

Data in parentheses are 95% CIs through bootstrapping. The table is limited to the eight most common ultrasound systems in the OMLC-RS dataset. Kappa = Cohen's kappa coefficient. MCC = Matthew's correlation coefficient.



**Supplementary Table 5 | Performance of AI models and human examiners by level of confidence in examiners' assessments**

| Confidence                           |             | F1 score                | Sensitivity             | Specificity             | Accuracy                | Kappa                  | MCC                    | AUC                    | Brier score            |
|--------------------------------------|-------------|-------------------------|-------------------------|-------------------------|-------------------------|------------------------|------------------------|------------------------|------------------------|
| <b>Certain</b><br><i>n</i> = 10,079  | AI models   | 87.08%<br>(86.28–87.88) | 88.98%<br>(87.96–89.94) | 90.77%<br>(90.04–91.46) | 90.10%<br>(89.50–90.68) | 0.791<br>(0.778–0.803) | 0.791<br>(0.779–0.803) | 0.952<br>(0.948–0.957) | 0.084<br>(0.081–0.087) |
|                                      | Non-expert  | 84.24%<br>(83.36–85.09) | 87.26%<br>(86.17–88.31) | 88.04%<br>(87.23–88.85) | 87.75%<br>(87.10–88.38) | 0.742<br>(0.729–0.756) | 0.744<br>(0.730–0.757) |                        |                        |
| <b>Probable</b><br><i>n</i> = 10,951 | AI models   | 81.19%<br>(80.35–82.03) | 82.44%<br>(81.36–83.51) | 84.80%<br>(83.93–85.68) | 83.80%<br>(83.12–84.49) | 0.670<br>(0.656–0.684) | 0.670<br>(0.656–0.684) | 0.909<br>(0.904–0.914) | 0.124<br>(0.120–0.127) |
|                                      | Non-experts | 70.14%<br>(69.11–71.15) | 75.25%<br>(74.01–76.50) | 71.04%<br>(69.92–72.16) | 72.82%<br>(71.98–73.66) | 0.454<br>(0.438–0.471) | 0.458<br>(0.441–0.474) |                        |                        |
| <b>Uncertain</b><br><i>n</i> = 2,805 | AI models   | 80.63%<br>(78.95–82.27) | 81.66%<br>(79.52–83.76) | 82.96%<br>(81.07–84.79) | 82.38%<br>(80.93–83.74) | 0.645<br>(0.616–0.672) | 0.645<br>(0.616–0.673) | 0.899<br>(0.887–0.910) | 0.131<br>(0.125–0.137) |
|                                      | Non-experts | 59.83%<br>(57.63–61.97) | 64.62%<br>(61.90–67.28) | 58.09%<br>(55.58–60.61) | 61.03%<br>(59.18–62.85) | 0.224<br>(0.187–0.260) | 0.226<br>(0.190–0.262) |                        |                        |
| <b>Certain</b><br><i>n</i> = 16,209  | AI models   | 88.69%<br>(88.11–89.25) | 90.25%<br>(89.50–90.96) | 91.42%<br>(90.87–91.98) | 90.96%<br>(90.52–91.40) | 0.812<br>(0.803–0.821) | 0.812<br>(0.803–0.821) | 0.957<br>(0.954–0.960) | 0.079<br>(0.077–0.082) |
|                                      | Experts     | 88.21%<br>(87.62–88.78) | 90.58%<br>(89.87–91.29) | 90.43%<br>(89.85–91.00) | 90.49%<br>(90.04–90.94) | 0.802<br>(0.793–0.812) | 0.803<br>(0.794–0.812) |                        |                        |
| <b>Probable</b><br><i>n</i> = 9,516  | AI models   | 77.83%<br>(76.83–78.82) | 79.20%<br>(77.94–80.45) | 82.31%<br>(81.27–83.32) | 81.00%<br>(80.21–81.79) | 0.612<br>(0.596–0.628) | 0.612<br>(0.596–0.629) | 0.880<br>(0.873–0.887) | 0.142<br>(0.138–0.145) |
|                                      | Experts     | 70.40%<br>(69.29–71.49) | 74.15%<br>(72.80–75.50) | 73.43%<br>(72.27–74.58) | 73.73%<br>(72.86–74.60) | 0.469<br>(0.451–0.486) | 0.471<br>(0.453–0.489) |                        |                        |
| <b>Uncertain</b><br><i>n</i> = 1,619 | AI models   | 75.33%<br>(72.87–77.70) | 76.05%<br>(72.89–79.04) | 77.99%<br>(75.20–80.68) | 77.10%<br>(75.05–79.06) | 0.539<br>(0.498–0.579) | 0.540<br>(0.498–0.579) | 0.844<br>(0.825–0.862) | 0.162<br>(0.153–0.171) |
|                                      | Experts     | 59.77%<br>(56.85–62.61) | 61.46%<br>(57.99–64.93) | 62.38%<br>(59.19–65.58) | 61.96%<br>(59.67–64.30) | 0.237<br>(0.191–0.285) | 0.238<br>(0.191–0.285) |                        |                        |

Data in parentheses are 95% CIs through bootstrapping. Kappa = Cohen's kappa coefficient. MCC = Matthew's correlation coefficient.

**Supplementary Table 6 | Performance of AI models and human examiners by patient age group**

| Age group | Cases                                 |             | F1 score                | Sensitivity             | Specificity             | Accuracy                | Kappa                  | MCC                    | AUC                    | Brier score            |
|-----------|---------------------------------------|-------------|-------------------------|-------------------------|-------------------------|-------------------------|------------------------|------------------------|------------------------|------------------------|
| $\leq 29$ | 315<br>(243 benign,<br>72 malignant)  | AI models   | 67.10%<br>(57.97–75.34) | 72.22%<br>(61.43–82.35) | 87.24%<br>(82.92–91.29) | 83.81%<br>(79.68–87.94) | 0.564<br>(0.454–0.669) | 0.567<br>(0.458–0.672) | 0.888<br>(0.845–0.927) | 0.119<br>(0.100–0.139) |
|           |                                       | Experts     | 65.41%<br>(55.70–72.63) | 75.00%<br>(64.06–84.21) | 83.54%<br>(78.51–87.97) | 81.59%<br>(77.14–85.71) | 0.531<br>(0.416–0.626) | 0.543<br>(0.426–0.632) |                        |                        |
|           |                                       | Non-experts | 57.29%<br>(47.90–65.33) | 72.22%<br>(62.16–82.86) | 76.13%<br>(70.20–81.05) | 75.24%<br>(70.16–79.68) | 0.408<br>(0.299–0.510) | 0.428<br>(0.318–0.529) |                        |                        |
|           |                                       | AI models   | 78.14%<br>(71.56–83.87) | 84.85%<br>(77.45–91.67) | 90.80%<br>(87.64–93.71) | 89.49%<br>(86.58–92.17) | 0.713<br>(0.632–0.786) | 0.717<br>(0.638–0.789) | 0.939<br>(0.911–0.963) | 0.091<br>(0.078–0.106) |
|           |                                       | Experts     | 71.80%<br>(64.11–77.39) | 81.82%<br>(75.23–90.00) | 85.63%<br>(81.98–89.36) | 85.01%<br>(81.66–88.37) | 0.610<br>(0.529–0.693) | 0.620<br>(0.543–0.702) |                        |                        |
|           |                                       | Non-experts | 60.41%<br>(52.94–67.19) | 75.76%<br>(67.39–84.16) | 78.16%<br>(73.95–82.70) | 77.85%<br>(74.05–81.66) | 0.460<br>(0.372–0.546) | 0.480<br>(0.391–0.565) |                        |                        |
| 30–39     | 447<br>(348 benign,<br>99 malignant)  | AI models   | 84.04%<br>(80.09–87.58) | 85.65%<br>(80.75–90.32) | 88.01%<br>(84.30–91.44) | 87.07%<br>(84.22–89.92) | 0.732<br>(0.670–0.789) | 0.732<br>(0.671–0.790) | 0.924<br>(0.899–0.945) | 0.110<br>(0.096–0.125) |
|           |                                       | Experts     | 80.47%<br>(76.12–84.21) | 83.25%<br>(77.78–88.12) | 84.23%<br>(80.06–88.13) | 83.84%<br>(80.61–86.88) | 0.668<br>(0.599–0.729) | 0.670<br>(0.601–0.730) |                        |                        |
|           |                                       | Non-experts | 75.06%<br>(70.67–79.57) | 79.90%<br>(74.02–84.89) | 78.86%<br>(74.27–83.33) | 79.09%<br>(75.67–82.51) | 0.572<br>(0.502–0.643) | 0.574<br>(0.505–0.645) |                        |                        |
|           |                                       | AI models   | 85.51%<br>(81.82–88.99) | 88.24%<br>(83.70–92.49) | 86.09%<br>(81.89–90.16) | 87.02%<br>(84.04–90.00) | 0.738<br>(0.675–0.799) | 0.739<br>(0.678–0.799) | 0.931<br>(0.907–0.954) | 0.107<br>(0.093–0.122) |
|           |                                       | Experts     | 79.34%<br>(74.76–83.33) | 82.35%<br>(76.92–87.50) | 80.45%<br>(75.66–85.09) | 81.28%<br>(77.66–84.68) | 0.624<br>(0.550–0.692) | 0.626<br>(0.552–0.693) |                        |                        |
|           |                                       | Non-experts | 73.66%<br>(69.06–78.24) | 78.92%<br>(72.77–83.92) | 74.06%<br>(68.54–79.25) | 75.53%<br>(71.91–79.79) | 0.512<br>(0.438–0.592) | 0.516<br>(0.442–0.595) |                        |                        |
| 40–49     | 526<br>(317 benign,<br>209 malignant) | AI models   | 84.45%<br>(81.09–88.31) | 82.35%<br>(77.29–87.14) | 85.56%<br>(80.23–90.52) | 83.79%<br>(80.05–87.28) | 0.675<br>(0.600–0.745) | 0.676<br>(0.603–0.746) | 0.908<br>(0.878–0.935) | 0.122<br>(0.104–0.141) |
|           |                                       | Experts     | 80.82%<br>(76.61–84.62) | 80.09%<br>(74.65–85.17) | 77.78%<br>(71.68–83.89) | 79.05%<br>(75.06–83.04) | 0.577<br>(0.496–0.656) | 0.577<br>(0.497–0.657) |                        |                        |
|           |                                       | Non-experts | 77.88%<br>(73.43–82.02) | 77.38%<br>(71.37–82.41) | 74.44%<br>(68.10–80.85) | 75.81%<br>(71.82–80.05) | 0.510<br>(0.430–0.599) | 0.510<br>(0.430–0.599) |                        |                        |
|           |                                       | AI models   | 88.51%<br>(84.78–91.88) | 86.03%<br>(80.85–90.96) | 86.73%<br>(80.19–92.62) | 86.30%<br>(82.19–90.07) | 0.716<br>(0.630–0.795) | 0.718<br>(0.633–0.797) | 0.947<br>(0.921–0.970) | 0.098<br>(0.081–0.115) |
|           |                                       | Experts     | 86.59%<br>(82.70–90.16) | 86.03%<br>(80.81–90.91) | 79.65%<br>(72.12–87.04) | 83.56%<br>(79.45–87.67) | 0.657<br>(0.558–0.735) | 0.658<br>(0.559–0.736) |                        |                        |
|           |                                       | Non-experts | 84.21%<br>(80.12–88.39) | 81.56%<br>(75.84–87.08) | 82.30%<br>(74.07–88.39) | 81.16%<br>(77.05–85.96) | 0.612<br>(0.518–0.702) | 0.615<br>(0.522–0.704) |                        |                        |
| 50–59     | 470<br>(266 benign,<br>204 malignant) | AI models   | 85.51%<br>(81.82–88.99) | 88.24%<br>(83.70–92.49) | 86.09%<br>(81.89–90.16) | 87.02%<br>(84.04–90.00) | 0.738<br>(0.675–0.799) | 0.739<br>(0.678–0.799) | 0.931<br>(0.907–0.954) | 0.107<br>(0.093–0.122) |
|           |                                       | Experts     | 79.34%<br>(74.76–83.33) | 82.35%<br>(76.92–87.50) | 80.45%<br>(75.66–85.09) | 81.28%<br>(77.66–84.68) | 0.624<br>(0.550–0.692) | 0.626<br>(0.552–0.693) |                        |                        |
|           |                                       | Non-experts | 73.66%<br>(69.06–78.24) | 78.92%<br>(72.77–83.92) | 74.06%<br>(68.54–79.25) | 75.53%<br>(71.91–79.79) | 0.512<br>(0.438–0.592) | 0.516<br>(0.442–0.595) |                        |                        |
|           |                                       | AI models   | 84.45%<br>(81.09–88.31) | 82.35%<br>(77.29–87.14) | 85.56%<br>(80.23–90.52) | 83.79%<br>(80.05–87.28) | 0.675<br>(0.600–0.745) | 0.676<br>(0.603–0.746) | 0.908<br>(0.878–0.935) | 0.122<br>(0.104–0.141) |
|           |                                       | Experts     | 80.82%<br>(76.61–84.62) | 80.09%<br>(74.65–85.17) | 77.78%<br>(71.68–83.89) | 79.05%<br>(75.06–83.04) | 0.577<br>(0.496–0.656) | 0.577<br>(0.497–0.657) |                        |                        |
|           |                                       | Non-experts | 77.88%<br>(73.43–82.02) | 77.38%<br>(71.37–82.41) | 74.44%<br>(68.10–80.85) | 75.81%<br>(71.82–80.05) | 0.510<br>(0.430–0.599) | 0.510<br>(0.430–0.599) |                        |                        |
| 60–69     | 401<br>(180 benign,<br>221 malignant) | AI models   | 84.45%<br>(81.09–88.31) | 82.35%<br>(77.29–87.14) | 85.56%<br>(80.23–90.52) | 83.79%<br>(80.05–87.28) | 0.675<br>(0.600–0.745) | 0.676<br>(0.603–0.746) | 0.908<br>(0.878–0.935) | 0.122<br>(0.104–0.141) |
|           |                                       | Experts     | 80.82%<br>(76.61–84.62) | 80.09%<br>(74.65–85.17) | 77.78%<br>(71.68–83.89) | 79.05%<br>(75.06–83.04) | 0.577<br>(0.496–0.656) | 0.577<br>(0.497–0.657) |                        |                        |
|           |                                       | Non-experts | 77.88%<br>(73.43–82.02) | 77.38%<br>(71.37–82.41) | 74.44%<br>(68.10–80.85) | 75.81%<br>(71.82–80.05) | 0.510<br>(0.430–0.599) | 0.510<br>(0.430–0.599) |                        |                        |
|           |                                       | AI models   | 88.51%<br>(84.78–91.88) | 86.03%<br>(80.85–90.96) | 86.73%<br>(80.19–92.62) | 86.30%<br>(82.19–90.07) | 0.716<br>(0.630–0.795) | 0.718<br>(0.633–0.797) | 0.947<br>(0.921–0.970) | 0.098<br>(0.081–0.115) |
|           |                                       | Experts     | 86.59%<br>(82.70–90.16) | 86.03%<br>(80.81–90.91) | 79.65%<br>(72.12–87.04) | 83.56%<br>(79.45–87.67) | 0.657<br>(0.558–0.735) | 0.658<br>(0.559–0.736) |                        |                        |
|           |                                       | Non-experts | 84.21%<br>(80.12–88.39) | 81.56%<br>(75.84–87.08) | 82.30%<br>(74.07–88.39) | 81.16%<br>(77.05–85.96) | 0.612<br>(0.518–0.702) | 0.615<br>(0.522–0.704) |                        |                        |
| 70 $\leq$ | 292<br>(113 benign,<br>179 malignant) | AI models   | 88.51%<br>(84.78–91.88) | 86.03%<br>(80.85–90.96) | 86.73%<br>(80.19–92.62) | 86.30%<br>(82.19–90.07) | 0.716<br>(0.630–0.795) | 0.718<br>(0.633–0.797) | 0.947<br>(0.921–0.970) | 0.098<br>(0.081–0.115) |
|           |                                       | Experts     | 86.59%<br>(82.70–90.16) | 86.03%<br>(80.81–90.91) | 79.65%<br>(72.12–87.04) | 83.56%<br>(79.45–87.67) | 0.657<br>(0.558–0.735) | 0.658<br>(0.559–0.736) |                        |                        |
|           |                                       | Non-experts | 84.21%<br>(80.12–88.39) | 81.56%<br>(75.84–87.08) | 82.30%<br>(74.07–88.39) | 81.16%<br>(77.05–85.96) | 0.612<br>(0.518–0.702) | 0.615<br>(0.522–0.704) |                        |                        |
|           |                                       | AI models   | 88.51%<br>(84.78–91.88) | 86.03%<br>(80.85–90.96) | 86.73%<br>(80.19–92.62) | 86.30%<br>(82.19–90.07) | 0.716<br>(0.630–0.795) | 0.718<br>(0.633–0.797) | 0.947<br>(0.921–0.970) | 0.098<br>(0.081–0.115) |
|           |                                       | Experts     | 86.59%<br>(82.70–90.16) | 86.03%<br>(80.81–90.91) | 79.65%<br>(72.12–87.04) | 83.56%<br>(79.45–87.67) | 0.657<br>(0.558–0.735) | 0.658<br>(0.559–0.736) |                        |                        |
|           |                                       | Non-experts | 84.21%<br>(80.12–88.39) | 81.56%<br>(75.84–87.08) | 82.30%<br>(74.07–88.39) | 81.16%<br>(77.05–85.96) | 0.612<br>(0.518–0.702) | 0.615<br>(0.522–0.704) |                        |                        |

Data in parentheses are 95% CIs through bootstrapping. Kappa = Cohen's kappa coefficient. MCC = Matthew's correlation coefficient. Information on patient age was missing for 125 patients.

**Supplementary Table 7 | Performance of AI models and human examiners by year of examination**

| Year of examination | Cases                                 |             | F1 score                | Sensitivity             | Specificity             | Accuracy                | Kappa                  | MCC                    | AUC                    | Brier score            |
|---------------------|---------------------------------------|-------------|-------------------------|-------------------------|-------------------------|-------------------------|------------------------|------------------------|------------------------|------------------------|
| 2006–2014           | 493<br>(301 benign,<br>192 malignant) | AI models   | 84.24%<br>(80.10–87.94) | 84.90%<br>(79.69–89.78) | 89.37%<br>(85.71–92.71) | 87.63%<br>(84.58–90.47) | 0.741<br>(0.677–0.799) | 0.741<br>(0.677–0.799) | 0.935<br>(0.910–0.956) | 0.101<br>(0.088–0.116) |
|                     |                                       | Experts     | 80.00%<br>(75.54–84.24) | 80.21%<br>(75.00–86.14) | 86.71%<br>(82.71–90.37) | 84.38%<br>(81.14–87.63) | 0.672<br>(0.604–0.738) | 0.672<br>(0.604–0.738) |                        |                        |
|                     |                                       | Non-experts | 74.75%<br>(69.85–79.41) | 77.60%<br>(71.43–83.33) | 81.06%<br>(76.56–85.47) | 79.51%<br>(76.06–83.16) | 0.577<br>(0.503–0.650) | 0.578<br>(0.505–0.652) |                        |                        |
| 2015–2017           | 556<br>(349 benign,<br>207 malignant) | AI models   | 82.78%<br>(78.70–86.55) | 83.57%<br>(78.39–88.63) | 89.11%<br>(85.75–92.33) | 87.05%<br>(84.17–89.75) | 0.724<br>(0.663–0.782) | 0.724<br>(0.664–0.782) | 0.919<br>(0.894–0.942) | 0.109<br>(0.094–0.124) |
|                     |                                       | Experts     | 77.52%<br>(72.86–81.58) | 80.19%<br>(74.34–85.34) | 83.95%<br>(80.24–87.89) | 82.55%<br>(79.50–85.61) | 0.634<br>(0.566–0.696) | 0.635<br>(0.567–0.697) |                        |                        |
|                     |                                       | Non-experts | 70.37%<br>(65.43–75.11) | 73.91%<br>(67.89–79.80) | 78.51%<br>(74.25–82.91) | 76.80%<br>(73.38–80.40) | 0.515<br>(0.442–0.586) | 0.517<br>(0.444–0.588) |                        |                        |
| 2018                | 405<br>(233 benign,<br>172 malignant) | AI models   | 82.87%<br>(78.49–86.84) | 87.21%<br>(81.98–92.03) | 82.83%<br>(77.83–87.50) | 84.69%<br>(81.23–88.15) | 0.691<br>(0.619–0.758) | 0.694<br>(0.624–0.761) | 0.919<br>(0.890–0.943) | 0.118<br>(0.101–0.136) |
|                     |                                       | Experts     | 80.22%<br>(75.74–84.47) | 86.05%<br>(80.33–90.80) | 79.40%<br>(74.37–84.58) | 81.98%<br>(78.52–85.68) | 0.639<br>(0.568–0.712) | 0.644<br>(0.573–0.716) |                        |                        |
|                     |                                       | Non-experts | 74.48%<br>(69.54–79.43) | 81.98%<br>(75.90–87.50) | 72.96%<br>(66.53–78.17) | 76.05%<br>(72.34–80.49) | 0.524<br>(0.446–0.611) | 0.533<br>(0.455–0.617) |                        |                        |
| 2019                | 478<br>(260 benign,<br>218 malignant) | AI models   | 84.06%<br>(80.20–87.68) | 83.49%<br>(78.38–88.29) | 87.31%<br>(83.21–91.24) | 85.56%<br>(82.43–88.70) | 0.709<br>(0.643–0.771) | 0.709<br>(0.644–0.772) | 0.927<br>(0.902–0.948) | 0.109<br>(0.094–0.125) |
|                     |                                       | Experts     | 79.91%<br>(76.04–84.10) | 80.28%<br>(75.34–85.71) | 82.69%<br>(78.26–87.45) | 81.59%<br>(78.45–85.15) | 0.629<br>(0.564–0.702) | 0.629<br>(0.565–0.703) |                        |                        |
|                     |                                       | Non-experts | 75.85%<br>(71.39–80.35) | 77.06%<br>(71.36–82.67) | 78.85%<br>(73.31–83.27) | 77.82%<br>(74.06–81.59) | 0.553<br>(0.477–0.628) | 0.553<br>(0.478–0.628) |                        |                        |
| 2020–2021           | 728<br>(432 benign,<br>296 malignant) | AI models   | 83.50%<br>(80.20–86.62) | 85.47%<br>(81.29–89.38) | 86.81%<br>(83.56–89.93) | 86.26%<br>(83.79–88.74) | 0.717<br>(0.666–0.768) | 0.718<br>(0.667–0.769) | 0.939<br>(0.923–0.955) | 0.104<br>(0.094–0.116) |
|                     |                                       | Experts     | 79.17%<br>(75.66–82.64) | 84.12%<br>(79.81–88.22) | 80.79%<br>(76.84–84.31) | 82.01%<br>(79.26–84.89) | 0.634<br>(0.579–0.692) | 0.637<br>(0.583–0.695) |                        |                        |
|                     |                                       | Non-experts | 74.33%<br>(70.48–78.01) | 80.74%<br>(76.37–85.46) | 74.31%<br>(70.52–78.77) | 77.20%<br>(74.18–80.22) | 0.541<br>(0.480–0.602) | 0.548<br>(0.487–0.607) |                        |                        |

Data in parentheses are 95% CIs through bootstrapping. Kappa = Cohen's kappa coefficient. MCC = Matthew's correlation coefficient.

**Supplementary Table 8 | Performance of AI model on a separate cohort of cases from the Stockholm center**

|                    | <b>Remaining cases<br/>(n = 644)</b> | <b>Main analysis<br/>(n = 300)</b> |
|--------------------|--------------------------------------|------------------------------------|
| <b>F1 score</b>    | 84.73% (81.59–87.64)                 | 84.83% (80.40–88.77)               |
| <b>Sensitivity</b> | 92.81% (89.66–95.67)                 | 91.33% (86.52–95.54)               |
| <b>Specificity</b> | 80.05% (75.85–84.06)                 | 76.00% (68.87–82.67)               |
| <b>Accuracy</b>    | 85.56% (82.76–88.20)                 | 83.67% (79.33–87.67)               |
| <b>AUC</b>         | 0.954 (0.939–0.968)                  | 0.921 (0.889–0.948)                |
| <b>Kappa</b>       | 0.712 (0.658–0.765)                  | 0.673 (0.587–0.753)                |
| <b>MCC</b>         | 0.722 (0.671–0.772)                  | 0.681 (0.597–0.759)                |
| <b>Brier score</b> | 0.102 (0.090–0.115)                  | 0.121 (0.102–0.142)                |
| <b>DOR</b>         | 51.78 (32.51–94.76)                  | 33.37 (17.91–75.02)                |
| <b>J</b>           | 72.86% (67.71–77.84)                 | 67.33% (58.84–75.23)               |
| <b>LR+</b>         | 4.65 (3.84–5.84)                     | 3.81 (2.92–5.28)                   |
| <b>LR-</b>         | 0.090 (0.054–0.129)                  | 0.114 (0.059–0.180)                |
| <b>PPV</b>         | 77.95% (73.46–82.32)                 | 79.19% (73.02–85.06)               |
| <b>NPV</b>         | 93.61% (90.71–96.17)                 | 89.76% (84.14–94.66)               |

Performance of the AI model on the cohort of 644 patients with a post-surgical histological diagnosis (366 benign, 278 malignant) from the Stockholm center that were not included in the main analysis as they were not assessed by human examiners. Data in parentheses are 95% CIs through bootstrapping. Kappa = Cohen's kappa coefficient. MCC = Matthew's correlation coefficient. DOR = diagnostic odds ratio. J = Youden's J statistic. LR+ = Positive likelihood ratio. LR- = Negative likelihood ratio. PPV = Positive predictive value. NPV = Negative predictive value.

**Supplementary Table 9 | Impact of label granularity on AI model performance**

|                    | 2 classes            | 10 classes           | 18 classes            |
|--------------------|----------------------|----------------------|-----------------------|
| <b>F1 score</b>    | 82.22% (80.39–83.91) | 83.50% (81.76–85.14) | 82.70% (80.93–84.36)  |
| <b>Sensitivity</b> | 81.38% (79.00–83.58) | 84.88% (82.73–86.96) | 83.50% (81.26–85.65)  |
| <b>Specificity</b> | 88.57% (86.99–90.13) | 87.30% (85.66–88.94) | 87.30% (85.63–88.92)  |
| <b>Accuracy</b>    | 85.64% (84.29–86.95) | 86.32% (85.00–87.59) | 85.75% (84.44–87.07)  |
| <b>AUC</b>         | 0.928 (0.918–0.937)  | 0.929 (0.919–0.939)  | 0.930 (0.920–0.939)   |
| <b>Kappa</b>       | 0.702 (0.674–0.729)  | 0.718 (0.691–0.745)  | 0.706 (0.678–0.733)   |
| <b>MCC</b>         | 0.702 (0.674–0.729)  | 0.718 (0.691–0.745)  | 0.706 (0.679–0.733)   |
| <b>Brier score</b> | 0.137 (0.133–0.142)  | 0.108 (0.101–0.114)  | 0.106 (0.100–0.113)   |
| <b>DOR</b>         | 33.88 (27.46–42.37)  | 38.61 (31.16–48.74)  | 34.80 (28.23–43.73)   |
| <b>J</b>           | 69.95% (67.07–72.66) | 72.19% (69.46–74.86) | 70.80% (68.04–73.52)  |
| <b>LR+</b>         | 7.12 (6.22–8.27)     | 6.68 (5.90–7.69)     | 6.58 (5.80–7.56)      |
| <b>LR-</b>         | 0.210 (0.185–0.237)  | 0.173 (0.149–0.198)  | 0.189 (0.164–0.215)   |
| <b>PPV</b>         | 83.07% (80.83–85.26) | 82.16% (79.93–84.38) | 81.92% (79.63–84.18)  |
| <b>NPV</b>         | 87.35% (85.68–88.92) | 89.34% (87.77–90.84) | 88.478% (86.85–90.04) |

AI models were trained using two, ten, or 18 classes. At test-time, the model makes a binary prediction by averaging all the benign and malignant scores, as described in the main paper. Data in parentheses are 95% CIs through bootstrapping. Kappa = Cohen's kappa coefficient. MCC = Matthew's correlation coefficient. DOR = diagnostic odds ratio. J = Youden's J statistic. LR+ = Positive likelihood ratio. LR- = Negative likelihood ratio. PPV = Positive predictive value. NPV = Negative predictive value.

**Supplementary Table 10 | Impact of image cropping on AI model performance**

|                    | Cropped and artifacts removed | Cropped only         | Auto-cropped with YOLO <sup>c</sup> | Uncropped            |
|--------------------|-------------------------------|----------------------|-------------------------------------|----------------------|
| <b>F1 score</b>    | 83.50% (81.76–85.14)          | 82.88% (81.12–84.52) | 82.78% (81.04–84.41)                | 81.85% (80.09–83.53) |
| <b>Sensitivity</b> | 84.88% (82.73–86.96)          | 85.44% (83.29–87.46) | 85.71% (83.58–87.73)                | 84.61% (82.46–86.69) |
| <b>Specificity</b> | 87.30% (85.66–88.94)          | 85.71% (84.02–87.44) | 85.27% (83.55–87.02)                | 84.76% (82.98–86.52) |
| <b>Accuracy</b>    | 86.32% (85.00–87.59)          | 85.60% (84.25–86.92) | 85.45% (84.10–86.80)                | 84.70% (83.31–86.05) |
| <b>AUC</b>         | 0.929 (0.919–0.939)           | 0.926 (0.915–0.936)  | 0.926 (0.916–0.936)                 | 0.918 (0.907–0.928)  |
| <b>Kappa</b>       | 0.718 (0.691–0.745)           | 0.705 (0.677–0.731)  | 0.702 (0.674–0.729)                 | 0.687 (0.658–0.714)  |
| <b>MCC</b>         | 0.718 (0.691–0.745)           | 0.706 (0.678–0.732)  | 0.703 (0.676–0.731)                 | 0.688 (0.660–0.715)  |
| <b>Brier score</b> | 0.108 (0.101–0.114)           | 0.111 (0.104–0.117)  | 0.111 (0.104–0.117)                 | 0.119 (0.112–0.125)  |
| <b>DOR</b>         | 38.61 (31.16–48.74)           | 35.20 (28.38–44.22)  | 34.73 (28.14–43.69)                 | 30.58 (24.88–38.22)  |
| <b>J</b>           | 72.19% (69.46–74.86)          | 71.15% (68.37–73.82) | 70.98% (68.25–73.69)                | 69.37% (66.57–72.12) |
| <b>LR+</b>         | 6.68 (5.90–7.69)              | 5.98 (5.32–6.81)     | 5.82 (5.19–6.62)                    | 5.55 (4.96–6.30)     |
| <b>LR-</b>         | 0.173 (0.149–0.198)           | 0.170 (0.146–0.195)  | 0.168 (0.144–0.193)                 | 0.182 (0.157–0.207)  |
| <b>PPV</b>         | 82.16% (79.93–84.38)          | 80.47% (78.18–82.74) | 80.03% (77.73–82.30)                | 79.27% (76.92–81.59) |
| <b>NPV</b>         | 89.34% (87.77–90.84)          | 89.52% (87.93–91.02) | 89.65% (88.09–91.16)                | 88.88% (87.25–90.45) |

Data in parentheses are 95% CIs through bootstrapping. Kappa = Cohen's kappa coefficient. MCC = Matthew's correlation coefficient. DOR = diagnostic odds ratio. J = Youden's J statistic. LR+ = Positive likelihood ratio. LR- = Negative likelihood ratio. PPV = Positive predictive value. NPV = Negative predictive value.

**Supplementary Table 11 | Impact of domain shift on AI model performance**

|                    | In-domain            | Domain-shifted       | $\Delta(\text{in-domain} - \text{domain-shifted})$ | p-value  |
|--------------------|----------------------|----------------------|----------------------------------------------------|----------|
| <b>F1 score</b>    | 74.54% (69.71–78.97) | 70.34% (65.46–74.85) | 4.20 (0.85–7.65)                                   | 0.0132   |
| <b>Sensitivity</b> | 90.45% (85.89–94.55) | 93.26% (89.33–96.67) | -2.81 (-6.41–0.61)                                 | 0.1626   |
| <b>Specificity</b> | 80.58% (77.04–84.08) | 73.28% (69.26–77.18) | 7.31 (3.70–11.07)                                  | < 0.0001 |
| <b>Accuracy</b>    | 83.26% (80.37–86.00) | 78.69% (75.49–81.74) | 4.57 (1.83–7.46)                                   | 0.0020   |
| <b>AUC</b>         | 0.944 (0.923–0.963)  | 0.932 (0.909–0.953)  | 0.012 (-0.004–0.030)                               | 0.1450   |
| <b>Kappa</b>       | 0.626 (0.564–0.687)  | 0.552 (0.491–0.613)  | 0.074 (0.022–0.127)                                | 0.0068   |
| <b>MCC</b>         | 0.648 (0.591–0.704)  | 0.595 (0.540–0.649)  | 0.054 (0.005–0.103)                                | 0.0314   |
| <b>Brier score</b> | 0.115 (0.102–0.128)  | 0.153 (0.141–0.166)  | -0.038 (-0.047–(-)0.029)                           | < 0.0001 |
| <b>DOR</b>         | 39.31 (24.23–75.24)  | 37.93 (22.12–81.69)  | 1.37 (-30.29–26.44)                                | 0.8938   |
| <b>J</b>           | 71.03% (65.43–76.54) | 66.54% (61.03–71.85) | 4.50 (-0.57–9.70)                                  | 0.0808   |
| <b>LR+</b>         | 4.66 (3.91–5.71)     | 3.49 (3.02–4.10)     | 1.17 (0.50–2.04)                                   | 0.0006   |
| <b>LR-</b>         | 0.119 (0.067–0.175)  | 0.092 (0.045–0.146)  | 0.027 (-0.020–0.073)                               | 0.2690   |
| <b>PPV</b>         | 63.39% (57.44–69.26) | 56.46% (50.81–62.06) | 6.92 (3.07–11.01)                                  | 0.0006   |
| <b>NPV</b>         | 95.78% (93.72–97.63) | 96.69% (94.77–98.37) | -0.91 (-2.52–0.69)                                 | 0.2692   |

Performance of an AI model on data from a center included during training (in-domain), vs. the performance of an AI model trained on data from other centers (domain-shifted). Both models were evaluated on the same set of 657 cases from the Stockholm center. One of the models was trained on images from 500 cases from the Stockholm center (in-domain), while the other model was trained on images from 500 cases sampled from the other 19 centers (domain-shifted). Data are % (95% CI) or percentage points (95% CI) through bootstrapping, and p-values are based on two-sided non-parametric confidence interval tests. Kappa = Cohen's kappa coefficient. MCC = Matthew's correlation coefficient. DOR = diagnostic odds ratio. J = Youden's J statistic. LR+ = Positive likelihood ratio. LR- = Negative likelihood ratio. PPV = Positive predictive value. NPV = Negative predictive value.

**Supplementary Table 12 | Performance of CNN-based model**

|                    | Transformer (DeiT)   | CNN (ConvNeXt)       |
|--------------------|----------------------|----------------------|
| <b>F1 score</b>    | 83.50% (81.76–85.14) | 82.83% (81.11–84.53) |
| <b>Sensitivity</b> | 84.88% (82.73–86.96) | 85.16% (82.97–87.24) |
| <b>Specificity</b> | 87.30% (85.66–88.94) | 85.90% (84.19–87.61) |
| <b>Accuracy</b>    | 86.32% (85.00–87.59) | 85.60% (84.29–86.92) |
| <b>AUC</b>         | 0.929 (0.919–0.939)  | 0.925 (0.914–0.935)  |
| <b>Kappa</b>       | 0.718 (0.691–0.745)  | 0.704 (0.677–0.732)  |
| <b>MCC</b>         | 0.718 (0.691–0.745)  | 0.705 (0.678–0.733)  |
| <b>Brier score</b> | 0.108 (0.101–0.114)  | 0.118 (0.112–0.124)  |
| <b>DOR</b>         | 38.61 (31.16–48.74)  | 34.98 (28.37–44.12)  |
| <b>J</b>           | 72.19% (69.46–74.86) | 71.07% (68.33–73.79) |
| <b>LR+</b>         | 6.68 (5.90–7.69)     | 6.04 (5.37–6.89)     |
| <b>LR-</b>         | 0.173 (0.149–0.198)  | 0.173 (0.149–0.198)  |
| <b>PPV</b>         | 82.16% (79.93–84.38) | 80.63% (78.34–82.91) |
| <b>NPV</b>         | 89.34% (87.77–90.84) | 89.37% (87.78–90.88) |

Data in parentheses are 95% CIs through bootstrapping. Kappa = Cohen's kappa coefficient. MCC = Matthew's correlation coefficient. DOR = diagnostic odds ratio. J = Youden's J statistic. LR+ = Positive likelihood ratio. LR- = Negative likelihood ratio. PPV = Positive predictive value. NPV = Negative predictive value.



**Supplementary Table 13 | Distribution of manufacturers and ultrasound systems**

| Ultrasound system       | Cases         |
|-------------------------|---------------|
| <b>GE</b>               | 3,353 (91.8%) |
| Voluson E8              | 1,607 (44.0%) |
| Voluson E10             | 1,006 (27.5%) |
| Voluson E6              | 325 (8.9%)    |
| Voluson 730             | 171 (4.7%)    |
| Voluson S10             | 132 (3.6%)    |
| Voluson I               | 89 (2.4%)     |
| Voluson S8              | 18 (0.5%)     |
| Voluson P8              | 4 (0.1%)      |
| Voluson S6              | 1 (0.0%)      |
| <b>Samsung</b>          | 175 (4.8%)    |
| WS80A                   | 159 (4.4%)    |
| HS70A                   | 8 (0.2%)      |
| Hera W10                | 7 (0.2%)      |
| Accuvix A30             | 1 (0.0%)      |
| <b>Other</b>            | 124 (3.4%)    |
| Philips EPIQ            | 51 (1.4%)     |
| Mindray DC-70           | 44 (1.2%)     |
| Toshiba Aplio XG        | 15 (0.4%)     |
| Esaote MyLab            | 10 (0.3%)     |
| Mindray M9              | 1 (0.0%)      |
| Aloka Prosound SSD-5000 | 1 (0.0%)      |
| Canon Aplio i800        | 1 (0.0%)      |
| Hitachi (unknown model) | 1 (0.0%)      |

Counts are given with their percentage rate.

**Supplementary Table 14 | Breakdown of histological diagnoses at different levels of granularity**

| 2 classes             | n             | 10 classes                        | n           | 18 classes                                                               | n           | Histological                      | n           |                               |            |
|-----------------------|---------------|-----------------------------------|-------------|--------------------------------------------------------------------------|-------------|-----------------------------------|-------------|-------------------------------|------------|
| Benign                | 2,224 (60.9%) | Endometrioma                      | 336 (9.2%)  | Endometrioma                                                             | 336 (9.2%)  | Endometrioma                      | 336 (9.2%)  |                               |            |
|                       |               | Dermoid                           | 431 (11.8%) | Dermoid                                                                  | 431 (11.8%) | Dermoid                           | 431 (11.8%) |                               |            |
|                       |               | Other common benign               | 298 (8.2%)  | Simple, Inclusion cyst                                                   | 106 (2.9%)  | Simple cyst                       | 102 (2.8%)  |                               |            |
|                       |               |                                   |             | Paraovarian cyst                                                         | 47 (1.3%)   | Inclusion cyst                    | 4 (0.1%)    |                               |            |
|                       |               |                                   |             | Functional cyst                                                          | 54 (1.5%)   | Paraovarian cyst                  | 47 (1.3%)   |                               |            |
|                       |               |                                   |             | Hydrosalpinx,<br>Pyosalpinx,<br>Tubo-ovarian abscess,<br>Peritoneal cyst | 91 (2.5%)   | Functional cyst                   | 54 (1.5%)   |                               |            |
|                       |               |                                   |             | Hydrosalpinx                                                             |             | 43 (1.2%)                         |             |                               |            |
|                       |               |                                   |             | Pyosalpinx,<br>Tubo-ovarian abscess                                      |             | 32 (0.9%)                         |             |                               |            |
|                       |               | Peritoneal cyst                   | 16 (0.4%)   |                                                                          |             |                                   |             |                               |            |
|                       |               | Solid benign                      | 153 (4.2%)  | Solid benign                                                             | 153 (4.2%)  | Fibroma                           | 114 (3.1%)  |                               |            |
|                       |               | Cystadeno(fibro)ma                | 707 (19.4%) | Cystadenoma (serous)                                                     | 251 (6.9%)  | Thecoma                           | 26 (0.7%)   |                               |            |
|                       |               |                                   |             | Cystadenoma (mucinous)                                                   | 283 (7.7%)  | Myoma                             | 13 (0.4%)   |                               |            |
|                       |               |                                   |             | Cystadenofibroma                                                         | 173 (4.7%)  | Cystadenoma (serous)              | 251 (6.9%)  |                               |            |
|                       |               |                                   |             |                                                                          |             | Cystadenoma (mucinous)            | 283 (7.7%)  |                               |            |
|                       |               | Rare benign*                      | 66 (1.8%)   | Rare benign*                                                             | 66 (1.8%)   | Cystadenofibroma (serous)         | 151 (4.1%)  |                               |            |
|                       |               |                                   |             |                                                                          |             | Cystadenofibroma (mucinous)       | 22 (0.6%)   |                               |            |
|                       |               |                                   |             |                                                                          |             | Struma ovarii                     | 23 (0.6%)   |                               |            |
|                       |               |                                   |             |                                                                          |             | Brenner tumor                     | 15 (0.4%)   |                               |            |
|                       |               |                                   |             |                                                                          |             | Endometrioma (decidualized)       | 13 (0.4%)   |                               |            |
|                       |               |                                   |             |                                                                          |             | Schwannoma                        | 4 (0.1%)    |                               |            |
| Ultrasound follow-up* | 233 (6.4%)    | Ultrasound follow-up*             | 233 (6.4%)  | Leydig cell tumor                                                        | 3 (0.1%)    |                                   |             |                               |            |
|                       |               |                                   |             | Other rare benign                                                        | 8 (0.2%)    |                                   |             |                               |            |
|                       |               |                                   |             | Borderline (serous)                                                      | 207 (5.7%)  |                                   |             |                               |            |
|                       |               |                                   |             | Borderline (mucinous intestinal)                                         | 100 (2.7%)  |                                   |             |                               |            |
| Malignant             | 1,428 (39.1%) | Ovarian cancer (epithelial)       | 804 (22.0%) | Ovarian cancer (serous),<br>Carcinosarcoma,<br>Tubal cancer              | 556 (15.2%) | Ovarian cancer (serous)           | 487 (13.3%) |                               |            |
|                       |               |                                   |             | Ovarian cancer (mucinous)                                                | 53 (1.5%)   | Tubal cancer                      | 47 (1.3%)   |                               |            |
|                       |               |                                   |             | Ovarian cancer (endometrioid, clear-cell)                                | 195 (5.3%)  | Carcinosarcoma                    | 15 (0.4%)   |                               |            |
|                       |               |                                   |             | Ovarian cancer (non-epithelial)                                          | 116 (3.2%)  | Ovarian cancer (non-epithelial)   | 116 (3.2%)  | Other malignancy (epithelial) | 7 (0.2%)   |
|                       |               |                                   |             |                                                                          |             |                                   |             | Ovarian cancer (mucinous)     | 53 (1.5%)  |
|                       |               |                                   |             |                                                                          |             |                                   |             | Ovarian cancer (endometrioid) | 132 (3.6%) |
|                       |               | Ovarian cancer (clear-cell)       | 63 (1.7%)   |                                                                          |             |                                   |             |                               |            |
|                       |               | Metastasis                        | 201 (5.5%)  | Metastasis (other)                                                       | 127 (3.5%)  | Granulosa cell tumor              | 49 (1.3%)   |                               |            |
|                       |               |                                   |             |                                                                          |             | Yolc sac tumor                    | 11 (0.3%)   |                               |            |
|                       |               |                                   |             |                                                                          |             | Dysgerminoma                      | 10 (0.3%)   |                               |            |
|                       |               |                                   |             |                                                                          |             | Sertoli-Leydig cell tumor         | 10 (0.3%)   |                               |            |
|                       |               | Metastasis (colorectal, pancreas) | 74 (2.0%)   | Metastasis (colorectal, pancreas)                                        | 74 (2.0%)   | Mixed Germcell tumor              | 8 (0.2%)    |                               |            |
|                       |               |                                   |             |                                                                          |             | Other malignancy (non-epithelial) | 28 (0.8%)   |                               |            |
|                       |               |                                   |             |                                                                          |             | Metastasis (colorectal)           | 66 (1.8%)   |                               |            |
|                       |               |                                   |             |                                                                          |             | Metastasis (pancreas)             | 8 (0.2%)    |                               |            |
|                       |               |                                   |             |                                                                          |             | Metastasis (gastric)              | 41 (1.1%)   |                               |            |
|                       |               |                                   |             |                                                                          |             | Metastasis (breast)               | 24 (0.7%)   |                               |            |
|                       |               | Metastasis (other)                | 51 (1.4%)   | Metastasis (other)                                                       | 51 (1.4%)   | Metastasis (endometrial)          | 7 (0.2%)    |                               |            |
|                       |               |                                   |             |                                                                          |             | Metastasis (lymphoma)             | 4 (0.1%)    |                               |            |
|                       |               |                                   |             |                                                                          |             | Metastasis (other)                | 51 (1.4%)   |                               |            |

Counts are given with their percentage rate. Histological diagnoses were grouped into ten and 18 categories based on histological diagnosis from surgery and sonographic characteristics. \*For training, rare benign and ultrasound follow-up cases were, where possible, assigned to one of the other benign histological classes, based on the sonographic characteristics (as assessed by one expert examiner [E.E.]).

**Supplementary Table 15 | Center-wise summary of test dataset characteristics, separately for benign and malignant cases**

| Center                   | Images per case |           | Year of examination |                  | Age        |            |
|--------------------------|-----------------|-----------|---------------------|------------------|------------|------------|
|                          | Benign          | Malignant | Benign              | Malignant        | Benign     | Malignant  |
| Ancona, Italy            | 3 (3–4)         | 4 (3–5)   | 2020 (2020–2020)    | 2019 (2019–2020) | 49 (38–60) | 55 (44–70) |
| Athens, Greece           | 5 (3–6)         | 7 (4–10)  | 2019 (2018–2020)    | 2019 (2019–2020) | 40 (32–49) | 46 (33–61) |
| Barcelona, Spain         | 4 (4–5)         | 4 (4–5)   | 2015 (2012–2019)    | 2014 (2012–2019) | 42 (32–47) | 49 (40–62) |
| Bologna, Italy           | 4 (3–6)         | 6 (4–7)   | 2018 (2017–2019)    | 2018 (2016–2019) | 44 (33–57) | 45 (34–56) |
| Brescia, Italy           | 4 (3–6)         | 5 (3–8)   | 2017 (2016–2019)    | 2018 (2016–2020) | 45 (34–54) | 61 (52–67) |
| Cagliari, Italy          | 4 (3–5)         | 4 (3–6)   | 2010 (2010–2011)    | 2010 (2010–2011) | 42 (34–48) | 53 (32–62) |
| Katowice, Poland         | 3 (2–3)         | 4 (3–6)   | 2017 (2015–2019)    | 2017 (2014–2018) | 38 (32–42) | 51 (45–62) |
| Kaunas, Lithuania        | 6 (4–8)         | 6 (4–10)  | 2020 (2018–2020)    | 2019 (2018–2020) | 41 (31–59) | 54 (43–68) |
| Lublin, Poland           | 4 (3–5)         | 4 (3–6)   | 2017 (2016–2020)    | 2016 (2016–2020) | 42 (32–54) | 55 (42–64) |
| Lund, Sweden             | 2 (2–3)         | 3 (2–4)   | 2020 (2019–2020)    | 2020 (2019–2020) | 47 (34–64) | 62 (47–73) |
| Manila, Philippines      | 5 (4–7)         | 4 (3–5)   | 2019 (2019–2020)    | 2019 (2019–2019) | 32 (24–44) | 51 (38–57) |
| Milan, Italy             | 4 (3–4)         | 4 (3–6)   | 2017 (2016–2018)    | 2017 (2016–2018) | 50 (36–55) | 52 (45–62) |
| Milan 2, Italy           | 4 (3–4)         | 3 (2–4)   | 2016 (2013–2019)    | 2016 (2012–2018) | 44 (35–59) | 55 (47–65) |
| Monza, Italy             | 3 (3–4)         | 5 (4–6)   | 2018 (2018–2019)    | 2018 (2017–2019) | 44 (35–54) | 58 (48–69) |
| Pamplona, Spain          | 3 (2–3)         | 3 (2–3)   | 2010 (2009–2011)    | 2010 (2009–2011) | 39 (27–50) | 52 (41–67) |
| Prague, Czech Republic   | 6 (4–6)         | 4 (4–6)   | 2020 (2020–2020)    | 2020 (2019–2020) | 56 (39–68) | 58 (46–68) |
| Prague 2, Czech Republic | 5 (3–5)         | 5 (4–7)   | 2014 (2012–2015)    | 2014 (2012–2014) | 36 (31–48) | 51 (41–62) |
| Stockholm, Sweden        | 5 (3–8)         | 7 (4–9)   | 2019 (2018–2020)    | 2019 (2018–2020) | 49 (35–59) | 58 (44–72) |
| Trieste, Italy           | 5 (4–7)         | 8 (6–10)  | 2020 (2020–2020)    | 2020 (2019–2020) | 52 (40–59) | 56 (51–60) |
| OVERALL                  | 4 (3–5)         | 4 (3–6)   | 2018 (2016–2020)    | 2018 (2016–2020) | 43 (33–55) | 55 (44–65) |

Data are median (IQR).

## References

- [1] Van Calster, B. et al. A calibration hierarchy for risk models was defined: from utopia to empirical data. *J. Clin. Epidemiol.* **74**, 167–176 (2016).
- [2] Redmon, J., Divvala, S., Girshick, R. & Farhadi, A. You only look once: unified, real-time object detection. *Proceedings of the IEEE Conference on Computer Vision and Pattern Recognition*, 779–788 (2016).
